# Computational and robotic modeling reveal parsimonious combinations of interactions between individuals in schooling fish

Liu Lei<sup>1,2</sup>, Ramón Escobedo<sup>2</sup>, Clément Sire<sup>3</sup>, Guy Theraulaz<sup>2,\*</sup>

**1** University of Shanghai for Science and Technology, Shanghai, China

**2** Centre de Recherches sur la Cognition Animale, Centre de Biologie Intégrative, Centre National de la Recherche Scientifique (CNRS), Université Paul Sabatier (UPS), Toulouse, France

**3** Laboratoire de Physique Théorique, CNRS and UPS, Toulouse, France

\* [guy.theraulaz@univ-tlse3.fr](mailto:guy.theraulaz@univ-tlse3.fr)

## 1 Abstract

2 Coordinated movements and collective decision-making in fish schools result from complex interactions by which individual integrate information about the behavior of their  
3 neighbors. However, little is known about how individuals integrate this information  
4 to take decisions and control their movements. Here, we combine experiments with  
5 computational and robotic approaches to investigate the impact of different strategies  
6 for a fish to interact with its neighbors on collective swimming in groups of rummy-nose  
7 tetra (*Hemigrammus rhodostomus*). By means of a data-based model describing the  
8 interactions between pairs of *H. rhodostomus* (Calovi *et al.*, 2018), we show that the  
9 simple addition of the pairwise interactions with two neighbors quantitatively repro-  
10 duces the collective behaviors observed in groups of five fish. Increasing the number  
11 of neighbors with which a fish interacts does not significantly improve the simulation  
12 results. Remarkably, we found groups remain cohesive even when each fish only in-  
13 teracts with only one of its neighbors: the one that has the strongest contribution to  
14 its heading variation. But group cohesion is lost when each fish only interact with its  
15 nearest neighbor. We then investigated with a robotic platform the impact of the phys-  
16 ical embodiment of the interaction rules and the combinations of pairwise interactions  
17 on collective motion in groups of robots. Like fish, robots experience strong physical  
18 constraints such as the need to control their speed to avoid collisions with obstacles or  
19 other robots. We find swarms of robots are able to reproduce the behavioral patterns  
20 observed in groups of five fish when each robot interacts only with the neighbor having  
21 the strongest effect on its heading variation, and increasing the number of interacting  
22 neighbors doesn't significantly improve the quality of group behavior. Overall, our re-  
23 sults suggest that fish have to acquire only a minimal amount of information about their  
24 environment to coordinate their movements when swimming in groups.  
25

26 **Keywords:** Collective behavior, Flocking, Fish school, Interaction networks, Com-  
27 putational modeling, Swarm robotics

## 28 Author Summary

29 How do fish combine and integrate information from multiple neighbors when swim-  
30 ming in a school? What is the minimum amount of information needed by fish about

31 their environment to coordinate their motion? To answer these questions, we combine  
32 experiments with computational and robotic modeling to test several hypotheses about  
33 how individual fish could combine and integrate the information on the behavior of  
34 their neighbors when swimming in groups. Our research shows that, for both simulated  
35 agents and robots, using the information of two neighbors is sufficient to qualitatively  
36 reproduce the collective motion patterns observed in groups of fish. Remarkably, our  
37 results also show that it is possible to obtain group cohesion and coherent collective  
38 motion over long periods of time even when individuals only interact with their most in-  
39 fluential neighbor, that is, the one that exerts the most important force on their heading  
40 variation.

## 41 Introduction

42 One of the most remarkable characteristics of group-living animals is their ability to  
43 display a wide range of complex collective behaviors and to collectively solve problems  
44 through the coordination of actions performed by the group members [1–3]. It is now  
45 well established that these collective behaviors are self-organized and mainly result from  
46 local interactions between individuals [4, 5]. Thus, to understand the mechanisms that  
47 govern collective animal behaviors, we need to decipher the interactions between in-  
48 dividuals, to identify the information exchanged during these interactions and, finally,  
49 to characterize and quantify the effects of these interactions on the behavior of indi-  
50 viduals [6, 7]. There exists today a growing body of work that brought detailed information  
51 about the direct and indirect interactions involved in the collective behaviors of many  
52 animal groups, especially in social insects such as ants [8–11] and bees [12, 13]. Recently,  
53 we introduced a new method to disentangle and reconstruct the pairwise interactions  
54 involved in the coordinated motion of animal groups such as fish schools, flocks of birds,  
55 and human crowds [14]. This method leads to explicit and concise models which are  
56 straightforward to implement numerically. It remains an open and challenging problem  
57 to understand how individuals traveling in groups combine the information coming from  
58 their neighbors to coordinate their own motion.

59 To answer this question, one first needs to know which of its neighbors an individual  
60 interacts with in a group, *i.e.*, who are the influential neighbors. For instance, does  
61 an individual always interact with its nearest neighbors, and how many? Most models  
62 of collective motion in animal groups have generally considered that each individual  
63 within a group was influenced by all the neighbors located within some spatial domain  
64 centered around this individual [15, 16]. This is the case in particular of the Aoki-  
65 Couzin model [17, 18] and the Vicsek model [19]. In the latter, each individual aligns  
66 its direction of motion with the average direction of all individuals that are located  
67 within a fixed distance in its neighborhood. Other models, more directly connected to  
68 biological data, consider that the interactions between individuals are topological and  
69 that the movement of each individual in the group only relies on a finite number of  
70 neighbors. This is the case in the works done on starling flocks [20, 21] and on barred  
71 flagtails (*Kuhlia mugil*) [22]. In golden shiners (*Notemigonus crysoleucas*), another work  
72 has sought to reconstruct the visual information available to each individual [23]. In this  
73 species, it has been shown that a model was best explaining the experimental data when  
74 all the neighboring individuals that occupy an angular area on the retina of a focal fish  
75 that is greater than a given threshold are taken into account. However, because of the  
76 cognitive load that is required for an individual to constantly monitor the movements  
77 of a large number of neighbors, it has been suggested that animals may focus their  
78 attention on a small subset of their neighbors [24–26]. In a previous work, we found  
79 experimental evidences that support this assumption. In groups of rummy nose tetras  
80 (*Hemigrammus rhodostomus*) performing collective U-turns, we found that, at any time,

81 each fish pays attention to only a small subset of its neighbors, typically one or two,  
82 whose identity regularly changes [27]. However, we still ignore if the same pattern of  
83 interaction holds true when fish are schooling, *i.e.*, when individuals are moving together  
84 in a highly polarized manner and not performing some collective maneuver.

85 Then, one needs to know how does a fish integrate the information from its influential  
86 neighbors. The most common assumption is that animals respond by averaging pairwise  
87 responses to their neighbors (with added noise) [15–17]. However, existing work shows  
88 that the integration of information might be much more complex. In golden shiners,  
89 Katz *et al.* have shown that the combined effect of two neighbors on a fish response is  
90 close to averaging for turning, but somewhere between averaging and adding for speed  
91 adjustments [28]. This observation brings us back to a often neglected factor which is  
92 the impact of the physical constraints imposed on a fish movement by their body. Fish  
93 mainly achieve collision avoidance through the control of their speed and orientation  
94 at the individual level. However, existing models seldom treat collision avoidance in a  
95 physical way and most models assume that individuals move at a constant speed [6].  
96 This is the main reason why these models cannot be directly implemented in real physical  
97 robotic systems [29].

98 To better understand how individuals combine and integrate interactions with their  
99 neighbors in a group of moving animals, we first analyze the dynamics of collective  
100 movements in groups of five *H. rhodostomus* moving freely in a circular tank. Then,  
101 we investigate different strategies for combining pairwise interactions between fish and  
102 analyze their impact on collective motion. To do that, we use the data-driven computa-  
103 tional model developed by Calovi *et al.* [14] that describes the interactions involved in  
104 the coordination of burst-and-coast swimming in pairs of *H. rhodostomus*, and a swarm  
105 robotic platform that also allows us to investigate the impact of both direction and  
106 speed regulation. Finally, we compare the predictions of the computational and swarm  
107 robotics models with the experiments conducted under the same conditions with groups  
108 of fish. Our results show that individuals do not need to integrate the information about  
109 all their neighbors for a coordination to emerge at the group level. Indeed, if fish inter-  
110 act only with a single neighbor, the one having the strongest effect on the own heading  
111 variation, the group maintains its cohesion. Thus, each individual must interact with a  
112 very small number of neighbors, basically one or two, provided they are those who exert  
113 the stronger influence on its own movement.

## 114 Results

115 We collect three sets of data corresponding to *i*) our experiments with fish (*H. rhodosto-*  
116 *mus*), *ii*) our numerical simulations of the model derived in [14], and *iii*) our experiments  
117 with the robotic platform (see Fig. 1, S1 Video and S2 Video), from which we extract  
118 the trajectories of each individual (S3 Video). We characterize the collective behavior  
119 of fish, agents and robots by means of six quantities: the group cohesion  $C(t)$ , the  
120 group polarization  $P(t)$ , the mean distance to the wall  $\langle r_w \rangle(t)$ , the relative  
121 orientation of the barycenter of the group with respect to the wall  $\theta_w^B(t)$ , the index of  
122 rotation around the center of the tank  $\Gamma(t)$ , and the counter-milling index  $Q(t)$ , which  
123 measures the relative direction of rotation of individuals inside the group with respect  
124 to the direction of rotation of the group around the center of the tank (S4 Video). See  
125 Figs. 2 and 3 and the Material and Methods Section for the mathematical definition of  
126 these quantities.

127 We explore three different strategies of interaction between individuals and their  
128 neighbors with both the mathematical model and the swarm robotic platform. In the  
129 first strategy, individuals interact with their  $k$  nearest neighbors, with  $k = 1, 2$  and  $3$ .  
130 In the second strategy, the  $k$  neighbors are sampled randomly among the other  $N - 1$

131 individuals, and in the third strategy, the  $k$  selected neighbors are those having the  
132 largest absolute contribution to the instantaneous variation of heading of the focal  
133 individual, as given by the model. We also study the cases where there is no interaction  
134 between individuals ( $k = 0$ ) and the case where individuals interact with all the other  
135 individuals ( $k = 4$ ).

136 We define the *influence of a neighbor on a focal individual* as the intensity of the  
137 contribution of this neighbor to the heading variation of the focal individual. This influ-  
138 ence depends on the relative state of the neighbor with respect to the focal individual,  
139 which is determined by the triplet  $(d_{ij}, \psi_{ij}, \phi_{ij})$ , where  $d_{ij}$  is the distance between the  
140 focal individual  $i$  and its neighbor  $j$ ,  $\psi_{ij}$  is the angle with which  $i$  perceives  $j$ , and  $\phi_{ij}$   
141 is the difference of the heading angles, a measure of the alignment between  $i$  and  $j$  (Fig. 2).  
142 The influence of  $j$  on the heading variation of  $i$  is estimated by means of the analytical  
143 interaction functions of the mathematical model derived in [14] for fish swimming in  
144 pairs, and defined in Eq. (7) in the Material and Methods section.

## 145 Collective behavior in fish experiments

146 Fish form cohesive groups with an average cohesion  $C \approx 5$  cm (Fig. 4), they are highly  
147 polarized, with the 5 fish swimming in the same direction (huge peak at  $P \approx 1$ , Fig. 5),  
148 and remain quite close to the border of the tank, typically at  $\langle r_w \rangle \approx 7$  cm from the wall  
149 (Fig. 6), therefore almost always parallel to it (with a relative angle to the wall of the  
150 heading of the barycenter peaked at  $\theta_w^B \approx \pm\pi/2$ , Fig. 7). Fish rotate clockwise (CW) or  
151 counter-clockwise (CCW) around the center of the tank (large peaks at  $\Gamma \approx \pm 1$ , Fig. 8).

152 Besides being the most frequently observed, these patterns take place mostly at  
153 the same time, as shown by the density maps of polarization with respect to cohesion  
154 (panels labeled “FISH” in S1 Fig–S4 Fig): groups are more cohesive when they are highly  
155 polarized, and have more or less the same cohesion for intermediate or low values of the  
156 polarization (although data become scarce for low values of  $P$ ).

157 Quite frequently, groups are observed in which one fish swims in the opposite direc-  
158 tion to that of the other four, as shown by the small bump at  $P \approx 0.6$  in Fig. 5 and  
159  $\Gamma \approx \pm 0.6$  in Fig. 8. The contribution of a fish to the value of  $\Gamma$  is +1 when the fish rotates  
160 CCW and  $-1$  when it rotates CW, in both cases perfectly parallel to the wall. Thus, the  
161 observed experimental values correspond to the case where  $P = (1+1+1+1-1)/5 = 0.6$ ,  
162 and  $\Gamma = (1+1+1+1-1)/5 = 0.6$  or  $\Gamma = (-1-1-1-1+1)/5 = -0.6$ . Less frequent,  
163 but still noticeable, are situations where two fish swim in the opposite direction to that  
164 of the other three, as shown by the slight bumps at  $\Gamma \approx \pm 0.2$ , corresponding to three  
165 fish swimming CW and the other two CCW (*i.e.*,  $\Gamma \approx (-1-1-1+1+1)/5 = -0.2$ ) or,  
166 *vice versa*, three fish swimming CCW, and two CW ( $\Gamma \approx (1+1+1-1-1)/5 = 0.2$ ).

167 In addition to the individual rotation of fish around the tank, measured by  $\Gamma$ , we also  
168 report a collective pattern consisting in individual fish rotating around the barycenter  
169 of the group in a direction which is precisely opposite to the direction of rotation of  
170 the group around the center of the tank (Fig. 3, S4 Video). We call this collective  
171 movement a *counter-milling behavior*, and define the instantaneous degree of counter-  
172 milling  $Q(t)$  as a measure in  $[-1, 1]$  of the intensity with which both rotation movements  
173 are in opposed directions: when  $Q(t) < 0$ , fish rotate around their barycenter  $B$  in the  
174 opposite direction to that of the group (*counter-milling*), while when  $Q(t) > 0$ , fish  
175 rotate mainly in the same direction around  $B$  than the group around  $T$  (*super-milling*).

176 Fig. 9 shows that fish exhibit a counter-milling behavior much more frequently than a  
177 super-milling behavior. Counter-milling behaviors result from the fact that fish located  
178 at the front of the group have to reduce their speed as they get closer to the border, due  
179 to their linear movement between two consecutive kicks. Fish located at the back of  
180 the group move faster and outrun the slowing down fish, relegating them to the back of  
181 the group. Then, the few fish at the front of the group approach the border, they slow

182 down and are overtaken in turn by those who follow them. This maneuver is repeated  
183 successively, giving rise to the rotation of individual fish around the group center, in the  
184 opposite direction to the one that the group displays around the tank. This collective  
185 behavior resembles a perfectly coordinated swimming by relays which is nevertheless  
186 due to simple physical constraints, as already reported on wolf-packs hunting preys  
187 moving in circles [30].

## 188 Simulation results of the computational model

### 189 Collective motion in a circular tank

190 Panels (ABC) of Figs. 4–9 show the corresponding measures of the simulation data  
191 produced by the model for the different strategies of combination of the pairwise inter-  
192 actions. Panels (A) correspond to the strategy in which agents interact with the first  
193 nearest neighbors, panels (B) with neighbors chosen randomly, and panels (C) with  
194 neighbors selected according to the intensity of their influence on the focal agent. For  
195 the three strategies, we considered all the possible values of the number of neighbors  
196 with whom an agent interacts,  $k = 1, 2, 3$ , together with the case where there is no  
197 interaction between agents ( $k = 0$ ) and the case where agents interact with every other  
198 agent ( $k = 4$ ).

199 For comparison purposes, we have scaled the spatial axes of the PDFs corresponding  
200 to the model by a factor  $\lambda_M = 0.87$  (lines with different shades of blue in Figs. 4–9).  
201 This value is the minimizer of the  $l_1$ -norm of the difference between the PDF of group  
202 cohesion for fish data, and the PDF of group cohesion for the simulation data produced  
203 by the model when using the strategy involving the  $k = 2$  most influential neighbors.  
204 As the  $x$ -axis is multiplied by  $\lambda_M$ , the  $y$ -axis of the PDF is divided by  $\lambda_M$  to preserve  
205 the normalized form having integral equal to 1. Noticeably, the fact that the value  
206 of  $\lambda_M$  is close to 1 indicates that the model produces a quite satisfactory quantitative  
207 approximation to the data of real fish.

208 When  $k = 0$ , no interaction exists between agents and, as expected, there is no  
209 formation of group: individuals turn around the tank, they are close and parallel to the  
210 wall, but remain scattered along the border ( $C \approx 17.8\lambda_M$  cm,  $\langle r_w \rangle \approx 15\lambda_M$  cm), with  
211 a bell-shaped distribution of the polarization. Agents rotate around the tank in CW or  
212 CCW directions with the same probability, independently of the direction of rotation  
213 of the others; see the four huge peaks in the PDF of the rotation index (Fig. 8, gray  
214 lines) at  $\Gamma = \pm 0.6$ , corresponding to four agents turning in the same direction, and at  
215  $\Gamma = \pm 0.2$ , where three agents turn in the same direction.

216 When  $k = 1$ , whatever the strategy used to select the neighbor (the nearest one, a  
217 random selected one or the most influential one), the measures immediately reveal that  
218 interactions are at play, with groups becoming cohesive ( $C < 11\lambda_M$  cm) and drastically  
219 closer to the wall ( $\langle r_w \rangle < 7\lambda_M$  cm). Agents have frequently almost the same heading,  
220 the most often with 5 agents at the same time (clear peak at  $P \approx 0.9$ ), but also in  
221 groups of 4 and 3 (slightly perceptible peaks at  $P \approx 0.6$  and 0.2, respectively, in Fig. 5).  
222 Quite frequently also, the 5 agents have the same direction of rotation around the tank  
223 (large peaks at  $\Gamma = \pm 1$ ), and situations where 4 or 3 agents have the same direction of  
224 rotation are frequent (peaks at  $\Gamma = \pm 0.6$  and  $\Gamma = \pm 0.2$  respectively, in Fig. 8).

225 For the three strategies, the measures on collective behavior are relatively far from  
226 those obtained in fish experiments. Interacting only with the nearest neighbor produces  
227 a much less compact group than interacting with the most influential neighbor (the  
228 PDF of  $C(t)$  is much wider in Panel A than in Panel C in Fig. 4), while counter-milling  
229 practically doesn't exist when interacting with the nearest neighbor, but is already  
230 visible when interacting with the most influential one (S5 Fig). All strategies give rise  
231 to approximately the same level of polarization, while the rotation index is much more

232 peaked at  $\Gamma \approx \pm 1$  in the strategy that considers the nearest neighbor instead of the  
233 most influential one (Fig. 8A and C), although the central peaks are less pronounced in  
234 the PDF of the most influential strategy. The group is slightly closer to the border when  
235 individuals only interact with their nearest neighbor ( $\langle r_w \rangle$  is smaller and more peaked  
236 to the left in Panel A than in Panel C in Fig. 6). Note that when fish interact with a  
237 randomly chosen neighbor, group cohesion is worse than when they interact with the  
238 most influential one, but better than if they interact with their nearest neighbor (S5 Fig).  
239 Density maps show that one nearest neighbor is insufficient to convey the necessary  
240 information to reach the degree of cohesion and polarization observed in groups of  
241 fish (S1 Fig, S3 Fig).

242 When  $k = 2$ , all measures on collective behavior are improved, in the sense that they  
243 converge towards those observed in fish experiments. Whatever the strategy used to  
244 select the two neighbors, all individuals swim together and in the same direction, close to  
245 and along the border of the tank, and display a characteristic counter-milling behavior  
246 (S5 Fig). This is especially true for the distance to the wall, the rotation and counter-  
247 milling indices when fish interact with their nearest neighbors, whose measures overlap  
248 with those observed in real fish. Groups are indeed clearly more cohesive and more  
249 polarized than when using only one neighbor (Figs. 4–5). Cohesion and polarization  
250 coincide more frequently (S1 Fig, S3 Fig), and even more when neighbors are selected  
251 according to their influence. Even if quite satisfactory when compared to fish, other  
252 measures when interacting with two influential neighbors are not better than when  
253 interacting with the two nearest ones; see, *e.g.*, counter-milling (Fig. 9).

254 As noted previously, when fish interact with two neighbors randomly chosen, the  
255 characteristics of collective movements are intermediate between those obtained with  
256 the other two strategies. In particular, the results are better than those obtained with  
257 the strategy based on spatial proximity, due to the fact that at least one neighbor is  
258 shared 5/6 of the time, and both neighbors are the same in 1/6 of the time. Note also  
259 that it may happen that one of the two nearest neighbors may be located behind the  
260 focal fish, so that its influence on the focal fish is negligible with respect to the influence  
261 of the other neighbor, a situation that amounts for the focal fish to interact with only  
262 one neighbor.

263 When interacting with  $k = 3$  neighbors, results are almost identical for the three  
264 strategies because neighbors are the same a high percentage of the time (25% of the  
265 time the selected neighbors are the same, 75% of the time there are at least 2 neighbors  
266 in common to all the strategies, and there is always at least one neighbor in common).  
267 Using the 3 nearest neighbors instead of 2 only improves group cohesion, while using  
268 the 3 most influential ones, instead of 2, doesn't improve any of the measures, including  
269 density maps (S1 Fig, S3 Fig), and is even worse for counter-milling (Fig. 9, S5 Fig).

270 Using the  $k = 4$  neighbors to interact with doesn't improve the cohesion and polari-  
271 zation of the group in comparison to the preceding condition when  $k = 3$ .

## 272 Collective motion in an unbounded space

273 The model allows us to simulate a condition where agents are swimming in an unbounded  
274 space by removing the interaction with the wall. This condition is particularly important  
275 to study in order to measure the impact of the confinement of agents by the arena on  
276 group cohesion.

277 Fig. 10 shows the time evolution of group cohesion for the strategies of paying at-  
278 tention to the  $k$  most influential neighbors or to the  $k$  nearest neighbors, for  $k = 1$  to 4.  
279 Despite the fact that the wall is no longer present to keep the agents together, all the  
280 strategies except the one that consists in interacting only with the nearest neighbor  
281 allow the group to remain cohesive for more than 2.5 hours ( $\approx 10^4$  kicks) in numerical  
282 simulations (Fig. 10ABC). Note that when fish only interact with the most influential

283 neighbor, the group is highly cohesive ( $\lambda_M C(t) \approx 0.1$  m, Fig. 10A), but less than in the  
284 arena ( $\lambda_M C(t) \approx 0.07$  m, Fig. 4). This shows that the arena reinforces the cohesion  
285 of the group. However, when fish interact only with their first nearest neighbor the  
286 group disintegrates very quickly and then diffuses, with  $C^2(t)$  growing linearly in time  
287 (Fig. 10C). In any case, the strategies that consist in interacting with the most influen-  
288 tial neighbors always lead to more cohesive groups than when agents interact with the  
289 nearest ones. In addition, the choice of neighbors with which the agents interact also  
290 determines the distance  $d_{\text{cut}}$  beyond which an agent no longer perceives the attraction  
291 exerted by another agent.

292 When the attraction range between agents decreases, the model shows that for a fixed  
293 duration of the simulation, there exists a critical distance  $d_{\text{cut}}^*$  beyond which the agents  
294 do not interact anymore and freely diffuse until the end of the simulation (Fig. 10DE).  
295 The value  $d_{\text{cut}}^*$  depends on the strategy of interaction between agents. When the agents  
296 only interact with their most influential neighbor, the critical distance is  $d_{\text{cut}}^* \approx 0.9$  m,  
297 and is slightly shorter for  $k = 2, 3$  and 4 (around 0.75 m, Fig. 10D), while when the  
298 agents interact with the nearest neighbors,  $d_{\text{cut}}^*$  is around the same value than for the  
299 previous strategy when  $k = 3$ , but it is quite higher for  $k = 2$  (around 3.5 m), and  
300 even doesn't exist when  $k = 1$ . In that case, whatever the value of  $d_{\text{cut}}$ , the intensity  
301 of the attraction is not strong enough to keep the group cohesive (see the plateau for  
302  $d_{\text{cut}} \geq 1$  m in Fig. 10E).

### 303 Collective behavior in swarm robotics experiments

304 Panels (DEF) of Figs. 4–9 show the results of the robotic experiments performed in the  
305 same conditions as those studied with the model, including the case where robots do  
306 not interact with each other and the case where each robot interacts with all the others.  
307 Counter-milling in robots is shown in S6 Fig, and the density maps of cohesion and  
308 polarization are shown in S2 Fig and S4 Fig. The robotic platform and the monitoring  
309 of a swarm of 5 robots in motion are shown in S2 Video.

310 In general, the results of the robotic experiments are qualitatively very similar to  
311 those found in the simulations of the model, despite the physical constraints of real  
312 world. The main difference with the model concerns the control of speed by the robots  
313 to avoid collisions with the circular wall and other robots. This difference is especially  
314 relevant when  $k = 0$  because, in the model, agents are point particles and behave exactly  
315 as if they were alone in the arena.

316 Despite the fact that the size of the robotic platform has been scaled to correspond  
317 to that of the set-up used in the experiments with fish, the border has a stronger effect  
318 on the robots. Indeed, the collision avoidance protocol induces effective interactions  
319 between the robots that have a longer range than the interactions between fish. We  
320 found a much smaller scaling factor than in model simulations:  $\lambda_R = 0.35$ .

321 When  $k = 0$ , robots move independently from each other when they are suffi-  
322 ciently far from each other, and tend to remain dispersed along the border of the arena  
323 (S5 Video): the group cohesion is weak ( $C \approx 10\lambda_R = 28.5$  cm), and the mean distance  
324 to the wall is large ( $\langle r_w \rangle \approx 10\lambda_R$  cm). Robots are relatively more cohesive and closer to  
325 the wall than simulated agents because the confining effects of the border of the arena  
326 are stronger in robots than in agents (see Figs. 4, 6, S2 Fig and S6 Fig). Robots are  
327 mainly not polarized and exhibit the same peaks in the rotation index as those observed  
328 in the simulations for the same condition  $k = 0$ . The peaks observed in the PDF of  
329 the robots (Fig. 8D) are however much smaller than those of the model (Panel A, same  
330 figure); this is due to the fact that when two robots meet, the collision avoidance proce-  
331 dure forces them to change direction, thus breaking the continuity of their walk along  
332 the border, in opposition to what occurs in the model, since the point particles do not  
333 avoid each other when  $k = 0$ .

334 Interacting only with  $k = 1$  nearest neighbor does not allow robots to coordinate  
335 their motion and move as a coherent group (see S6 Video). Panel (D) of Figs. 4–9 show  
336 that the curves almost overlap with those obtained for  $k = 0$ , see, *e.g.*, the cohesion,  
337 the polarization, the mean distance to the wall, and the counter-milling, which is not  
338 visible (S6 Fig). On the other hand, when the robots interact with their most influential  
339 neighbor (S7 Video), the group is highly cohesive ( $C(t) < 6.5\lambda_R = 17$  cm, compared  
340 to  $10\lambda_R = 28.5$  cm when interacting with the nearest neighbor), highly polarized (large  
341 peak at  $P = 1$ , while there is no peak at all when interacting with the nearest neigh-  
342 bor), and individuals move quite close to the border ( $\langle r_w \rangle \approx 7\lambda_R = 20$  cm, instead  
343 of  $10\lambda_R = 28.5$  cm). Counter-milling is clearly visible (S7 Video and S6 Fig), and the  
344 similarity of the density maps of cohesion and polarization with those found in fish is  
345 the highest (S2 Fig and S4 Fig). Note that the rotation index doesn't display the two  
346 high peaks at  $\Gamma = \pm 1$ . This is due to the fact that the width of the group is frequently  
347 quite large ( $> 18$  cm) with respect to the size of the arena ( $R = 42$  cm). Thus, when the  
348 group of 5 robots moves slightly towards the center of the arena ( $r_w > 25$  cm from the  
349 border), one robot can end up on the other side of the arena with respect to its center  
350 When this happens, the contribution of this robot to the rotation index is opposite to  
351 the one of the other four, thus reducing the value of  $\Gamma$ , although the group is in perfect  
352 rotation around the tank.

353 Finally, for the strategy consisting in picking  $k = 1$  neighbor randomly, the re-  
354 sults are somewhat intermediate between those for the nearest and the most influential  
355 neighbor strategies, in terms of polarization, cohesiveness, rotation, and counter-milling  
356 (S8 Video). This intermediate features are in fact typical of this random strategy, as  
357 already observed in the model.

358 Extending the interaction with the  $k = 2$  nearest neighbors reinforces the coordi-  
359 nation and coherence of the group (S9 Video), which is more cohesive,  $C(t)$  decreases  
360 from around  $10\lambda_R = 28.6$  cm to  $7\lambda_R = 20$  cm, and simultaneously more frequently po-  
361 larized (S2 Fig), although polarization is still small: the PDF has a wide region of high  
362 values centered in  $P \approx 0.85$ , and is not peaked at  $P = 1$ . The high peak at  $P = 0.6$   
363 reveals that situations in which groups of 4 robots move in the same direction while  
364 the fifth one moves in the opposite direction are quite frequent (Fig. 5D). Wide groups  
365 (larger than 18 cm, Fig. 4D) moving far from the border (more than 22 cm, Fig. 6D) are  
366 still frequent, and counter-milling is not yet visible (S6 Fig). On the contrary, interact-  
367 ing with a second influential neighbor definitively produces patterns that are similar to  
368 those observed in fish experiments, especially if we consider the polarization, where the  
369 peak at  $P = 1$  clearly narrows and doubles its height (S10 Video and Fig. 5F), although  
370 the improvement with respect to the strategy that consists in interacting only with the  
371 most influential neighbor is small, or even negligible, if we consider the counter-milling  
372 index (Fig. 9). Regarding the rotation index, interacting with 2 most influential neigh-  
373 bors instead of one degrades the result: the central region of the PDF is higher and the  
374 peaks at  $\Gamma = \pm 1$  disappear (Fig. 8F), due to the same phenomenon described above,  
375 when the group is effectively rotating around the center of the arena but one or two  
376 robots cross to the other side of the arena.

377 Again, the strategy consisting in picking  $k = 2$  random neighbors leads to results  
378 markedly better than the  $k = 2$  nearest neighbors strategy, and almost similar to the  
379  $k = 2$  most influential neighbors strategy, in terms of polarization, cohesiveness, rotation,  
380 and counter-milling (see S11 Video).

381 One can improve the results only when the robots interact with a third neighbor  
382 ( $k = 3$ ) and whatever the interaction strategy which is considered. In that case, all  
383 strategies always share at least 2 neighbors (see S12 Video and S13 Video). Indeed,  
384 when  $k = 3$ , the PDF of the polarization displays the huge peak at  $P = 1$  observed in  
385 groups of fish (including the bump at  $P = 0.6$ , Figs. 5DE), the group is more cohesive



386 ( $C$  decreases to a mean value of  $6\lambda_R = 17$  cm and has a quite narrow PDF, Fig. 4DE)  
387 and polarized at the same time (S2 Fig), robots remain at a mean distance from the  
388 border of less than  $6\lambda_R$  cm, with also a narrow PDF similar to the one found in our  
389 fish experiments (Fig. 6DE), and counter-milling is clearly visible (S6 Fig). The results  
390 corresponding to the strategy that consists for a robot in interacting with its  $k = 3$   
391 most influential neighbors are omitted because they are statistically indistinguishable  
392 from those obtained when  $k = 2$ .

393 As we already observed in model simulations, the strategy that consists in interacting  
394 with neighbors randomly chosen leads to collective movements whose characteristics are  
395 intermediate between those obtained with the other two strategies (S13 Video). In  
396 particular, the results are closer to those observed in experiments with fish than those  
397 obtained when the robots interact with their nearest neighbors.

398 When robots interact with  $k = 4$  neighbors (S14 Video), the cohesion, the mean  
399 distance to the wall and the counter-milling are not improved in comparison to the  
400 condition when interacting with the  $k = 3$  nearest or random neighbors. Results are  
401 also quite similar to the condition when robots interact with the 2 most influential ones  
402 (Figs. 4, 6 and 9), while the group exhibits a higher peak at  $P = 0.6$  (Fig. 5) and the  
403 rotation index is almost flat (Fig. 8).

## 404 Discussion

405 Collective motion involving the coherent movements of groups of individuals is prima-  
406 rily a coordination problem. Each individual within a group must precisely adjust its  
407 behavior to that of its neighbors in order to produce coordinated motion. Previous  
408 works have suggested that, instead of averaging the contributions of a large number of  
409 neighbors, as suggested by many models [17–19, 22], individuals could pay attention to  
410 only a small number of neighbors [24–27]. This mechanism would overcome the natural  
411 limitation of amount of information each individual can handle [31]. Determining how  
412 these relevant neighbors are chosen at the individual scale is therefore a key element to  
413 understand the coordination mechanisms in moving animal groups.

414 Here, we addressed this question in groups of *H. rhodostomus* swimming in a circular  
415 tank. This species of fish is of particular interest because of its tendency to form  
416 highly polarized groups and its burst-and-coast swimming mode [14], which allows us to  
417 consider that each fish adjusts its heading direction at the onset of each bursting phase,  
418 that is labeled as a “kick”. Just before these brief accelerations, the fish integrates the  
419 information coming from its environment and performs the kick in the right direction.

420 In our experiments, groups of 5 fish remain highly cohesive, almost perfectly polar-  
421 ized, and turn around the tank in the same direction for very long periods while remain-  
422 ing close to the wall. Individual fish are also able to occasionally reverse their direction  
423 of motion with respect to those of other fish, and display a remarkable counter-milling  
424 collective behavior consisting in individual fish rotating around the group barycenter  
425 in the opposite direction to that of the group in the tank, so that individuals alternate  
426 their positions at the front of the group.

427 Based on a previous work in which we have reconstructed and modeled the form  
428 of the interactions of *H. rhodostomus* fish swimming in pairs [14], we analyzed three  
429 strategies of combining the pairwise interactions between a focal fish and a number  
430  $k = 1$  to 3 of its neighbors by means of a computational model and a robotic platform.  
431 In the first strategy, neighbors were selected according to their distance to the focal  
432 individual. In the second strategy, neighbors were randomly chosen, and in the third  
433 strategy, neighbors were selected according to the intensity of their contribution to the  
434 heading variation of the focal individual. The impact of these strategies on the resulting  
435 collective behavior was then measured and analyzed by mean of six quantities: group

436 cohesion, polarization index, rotation index, mean distance and relative orientation of  
437 the barycenter with respect to the border of the tank, and counter-milling index.

438 Our results suggest that when individuals (agents or robots) interact with a minimal  
439 number of neighbors, namely two, a group of individuals is able to reproduce the main  
440 characteristics of the collective movements observed in the fish experiments. Remark-  
441 ably, our results also show that it is possible to obtain coherent collective motion even  
442 when individuals only interact with their most influential neighbor, that is, the one that  
443 exerts the most important force on their heading variation. Moreover, when individuals  
444 interact with  $k$  randomly selected neighbors, the results are closer to the ones observed  
445 in fish experiments than when they interact with their  $k$  nearest neighbors.

446 In the simulations of the model, when the agents are interacting with a single neigh-  
447 bor, this immediately leads to the formation of groups. Whatever the strategy used to  
448 select a neighbor (the nearest one, a randomly chosen one or the most influential one),  
449 the quantities used to quantify group behavior show that the exchange of information  
450 with a single neighbor leads agents to get closer to each other at least temporarily. How-  
451 ever, whatever the strategy considered, cohesion, polarization and milling are still weak,  
452 suggesting that agents often remain alone and move independently. The simulations  
453 of the model in an open-bounded space show that group cohesion is maintained over  
454 long periods of time when agents only interact with their most influential neighbor, pro-  
455 vided the attraction range is above a critical threshold distance. However, when agents  
456 only interact with their nearest neighbor, this automatically leads to the dispersion of  
457 the group, which diffuses at a constant rate. Therefore, the cohesion of the group ob-  
458 served in the arena is not a consequence of the confinement of the agents, but mainly  
459 results from the higher quality of the information provided by the influential neighbors  
460 in comparison to the one provided by the nearest neighbors.

461 Then, when agents acquire more information about their environment (*i.e.*, when  
462  $k = 2$ ), all the interaction strategies implemented in the model give rise to collective  
463 behaviors that are in qualitative agreement with those observed in the experiments  
464 with fish, and a quantitative agreement is even reached for some quantities character-  
465 izing group behavior. But interaction strategies do not have the same effect on group  
466 behaviors: when agents interact with their most influential neighbors instead of the  
467 nearest ones, the cohesion is stronger, groups are more polarized, individuals reverse  
468 less, and milling is more frequent. When agents collect even more information about  
469 their environment (*i.e.*, when they pay attention to  $k = 3$  neighbors), the agreement with  
470 fish experiments is not improved if the neighbors are chosen according to their influence;  
471 however, groups become more cohesive and polarized when the agents interact with their  
472 nearest neighbors. Note that when agents interact with three neighbors, distinguishing  
473 the effects of the different interaction strategies becomes difficult since all agents always  
474 share at least two neighbors. Interacting with randomly chosen neighbors gives rise to  
475 group behaviors whose characteristics are intermediate between those resulting from the  
476 other two strategies, since when the agents are doing a random choice, they frequently  
477 select one or the other nearest or most influential neighbors. In summary, the simulation  
478 results clearly indicate that group behaviors similar to those observed in fish experiments  
479 can be reproduced by our model, provided that individuals interact with at least two  
480 of their neighbors at each decision time. In turn, no clear gain is obtained when agents  
481 interact with a third additional neighbor when the agents use a strategy based on  
482 influence, while group cohesion is only slightly improved when the agents use a strategy  
483 based on distance.

484 By implementing the behavioral fish model and the same local interaction strategies  
485 in our robotic platform, we also investigate the impact of the physical constraints and  
486 the collision avoidance protocols based on speed control on the group behavior. As in  
487 the model simulations, the strategy based on the influence exerted by the neighbors on

488 the instantaneous direction change is much more efficient than the strategy based on the  
489 distance of the neighbors to the focal robot. Remarkably, and as already observed in the  
490 model simulations, when robots only interact with their most influential neighbor, the  
491 group remains permanently cohesive, close to the border and highly polarized. Moreover,  
492 in that condition, robot reversions rarely occur, at least not as frequently than in groups  
493 of fish. By contrast, when robots only interact with their nearest neighbor, they are  
494 not able to exhibit any kind of coordinated behavior. Everything happens as if pairwise  
495 interactions between robots were masked by the effect induced by the collision avoidance  
496 protocols: the group cohesion, the polarization, and the mean distance of the group to  
497 the border are almost identical to those obtained with the null model, in which no  
498 interaction exists between robots except collision avoidance. When robots interact with  
499 two neighbors, the agreement with the results of fish experiments is improved, but it is  
500 only when robots interact with three neighbors that the strategy based on the distance  
501 produces highly cohesive and polarized groups that move close to the border and that  
502 rotate in a counter-milling way around the arena.

503 Overall, our results show that each individual must acquire a minimal amount of  
504 information about the behavior of its neighbors for coordination to emerge at the group  
505 level. This property could serve as a support for selective attention mechanisms, thus al-  
506 lowing individuals to adapt to information overload when they move in large groups [31].

## 507 Materials and Methods

### 508 Experimental procedures and data collection

509 **Ethics statement.** Our experiments have been approved by the Ethics Committee  
510 for Animal Experimentation of the Toulouse Research Federation in Biology N° 1 and  
511 comply with the European legislation for animal welfare.

512 **Study species.** Rummy-nose tetras (*Hemigrammus rhodostomus*) were purchased  
513 from Amazonie Labège (<http://www.amazonie.com>) in Toulouse, France. Fish were  
514 kept in 150 L aquariums on a 12:12 hour, dark:light photoperiod, at 25.2 °C ( $\pm 0.7$  °C)  
515 and were fed *ad libitum* with fish flakes. The average body length of the fish used in  
516 these experiments is 31 mm ( $\pm 2.5$  mm).

517 **Experimental setup.** We used a rectangular experimental tank of size 120×120 cm,  
518 made of glass, that we set on top of a box to isolate fish from vibrations. The setup  
519 was placed in a chamber made by four opaque white curtains surrounded by four LED  
520 light panels to provide an isotropic lighting. A circular tank of radius  $R = 250$  mm was  
521 set inside the experimental tank filled with 7 cm of water of controlled quality (50%  
522 of water purified by reverse osmosis and 50% of water treated by activated carbon)  
523 heated at 24.9 °C ( $\pm 0.8$  °C). Reflections of light due to the bottom of the experimental  
524 tank are avoided thanks to a white PVC layer. Each trial started by setting groups  
525 of fish randomly sampled from the breeding tank into the circular tank. Fish were let  
526 for 10 minutes to habituate before the start of the trial. A trial consisted in one hour  
527 of fish freely swimming (*i.e.*, without any external perturbation) in the circular tank.  
528 Fish trajectories were recorded by a Sony HandyCam HD camera filming from above  
529 the setup at 25 Hz (25 frames per second) in HDTV resolution (1920×1080p). We  
530 performed 11 trials with groups of  $N = 5$  fish.

## 531 Swarm robotic platform

532 **Robots.** We used a swarm robotic platform composed by small compact mobile robots  
533 that we called “Cuboids”, a name chosen in reference to the first realistic computer  
534 program that simulated the flocking behavior in birds and the schooling behavior in  
535 fish, called “Boids”, developed in 1986 by Craig Reynolds [32]. The Cuboids robots  
536 were specifically designed by us for this experiment.

537 Cuboids have a square basis of 40 mm×40 mm, they are 60 mm high and weigh  
538 50 grams (Fig. 11). We now describe the elements of a Cuboid; numbers between  
539 parentheses refer to labels in Fig. 11. Each robot is equipped with two differential  
540 wheels (7) driven by small DC motors (13). The small belts (9) connect wheels to the  
541 DC motors, which can drive the robot with a maximum speed of 50 mm/s. The two  
542 wheels are mounted on a central axis (6). An IEEE 802.11n/WIFI module (8) with a  
543 range of approximately 200 meters is used for communication network between robot  
544 and a wireless router. A Li-Poly rechargeable battery (15) provided energy for about 6  
545 hours in our experimental conditions. In addition, a coil (12) located under the robot,  
546 can be used to charge the robot wirelessly while it is working. The charging circuit  
547 is located on the side board (11). The robot bottom hosts a 32-bit, 168 MHz ARM  
548 microprocessor STM32F4 (14), which can provide multi control loops with the time  
549 duration up to 2ms. Besides, another 8-bit microcontroller PIC18F25k22 is mounted  
550 on the top sensor board (1), which controls a LCD screen (16) to display information  
551 and a 3-colors LED (17). The microprocessor communicates with the microcontroller  
552 by 4 copper bars (4), which can simultaneously provide power and communication bus.

553 Each Cuboid also has several sensors to measure the relative positions of other robots  
554 in its neighborhood and to send and receive messages from these robots. Within a  
555 sensing range of about 20 cm, a robot can send messages infrared signals by the center  
556 IR transmitter (3). There are two IR receivers (2) on both sides of the robots, which  
557 can determine the distance of a neighboring robot that transmit the infrared signal.  
558 From the two distance values provided by the IR receivers, the peering angle of this  
559 neighboring robot can be calculated by triangulation method. Furthermore, the relative  
560 position of the neighboring robot to the focal one can be computed by the information of  
561 distance and peering angle acquired before. On the other side, the IR signal also carries a  
562 short message that includes information on robot ID, orientation angle, speed and states.  
563 Moreover, each robot keeps a list of its neighbors with this information that is updated  
564 with time. If the robot does not receive the IR signal transmitted by a neighbor who is  
565 already in the list for a long time, the item related to this neighbor is deleted from the list.  
566 The heading of a Cuboid is measured by a motion tracking sensor MPU-9250 (18). This  
567 device consists of a 3-Axis gyroscope, a 3-Axis accelerometer and 3-Axis magnetometer.  
568 Hence, the MPU-9250 is a 9-axis Motion Tracking device that also combines a Digital  
569 Motion Processor. With its I2C bus connected with PIC18F25K22, the MPU-9250 can  
570 directly provide complete 9-axis Motion Fusion output to the microcontroller. These  
571 sensing and local communication devices have not been used in the experiments that  
572 have been done in a supervised mode.

573 **Experimental platform.** The robotic experimental setup consisted of a circular  
574 arena of radius 420 mm resting on a 1 m×1 m square flat surface with a camera (Basler  
575 piA2400-17gc) mounted on the top (see Fig. 12). A computer is connected to the cam-  
576 era to supervise the actions performed by the robots in the arena, and to perform the  
577 necessary image processing to track each robot and compute in real time its position  
578  $(x, y)$  and heading angle  $\phi$ .

579 The loop cycle of the imaging process module is 300 ms, a limit imposed by camera’s  
580 updating speed. A tracking software (Robots ID Tracker) based on the Kalman filter  
581 technology, is then used to assign the location data to the right robots on a shorter

582 time scale (every 20 ms). These data are used in real time to control the reaction of  
583 each robot in its changing environment, and are also stored in the computer for off-line  
584 *a posteriori* trajectory analysis. Thanks to the high precision of our tracking system,  
585 we are able to compute in real time and for each robot the quantities that characterize  
586 their instantaneous state with respect to their environment: the distance and relative  
587 orientation to the wall  $r_w$  and  $\theta_w$ , and the distance, relative angular position and relative  
588 orientation with respect to each neighbor,  $d_{ij}$ ,  $\psi_{ij}$  and  $\phi_{ij}$ , respectively (Fig. 2). All  
589 this information is used to compute the output of the interactions of a robot with its  
590 local environment by means of an Object-Oriented Programming software developed by  
591 us. Then, we compute the result of the mathematical model that controls the robot  
592 behavior, which combines the interactions with the obstacles and with the other robots,  
593 and generates the control signals dispatched in a distributed way to each individual  
594 robot through a WIFI communication router (HUAWEI WS831).

595 Fig. 13 shows the “hardware in loop” (HIL) simulation used to control the Cuboids  
596 robots. Each robot includes three fundamental parts: the sensors used to detect the  
597 local environment, a processor for computing its decisions, and the actuators to carry out  
598 the displacement. Although the robots are perfectly autonomous and can perform all  
599 the data collection and processing on-board, programming a robot is a time demanding  
600 task that must be repeated for each new experimental condition, so that, taking profit  
601 of the high speed communication system we implemented, we decided to execute the  
602 decision-making on the external computer, taking care of mimicking the conditions of  
603 autonomy and decentralization of the system. The HIL simulation integrates the robots  
604 hardware into the distributed control loops of the platform computer software. As such,  
605 it differs from a traditional software simulation, being a *semi-real* one. Compared with  
606 pure theoretical simulations “in silico”, the HIL simulation integrates the hardware  
607 constraints and provides more practical results in the physical environment.

## 608 Data extraction and pre-processing

609 Fish data were extracted from videos recorded during 11 sessions along 11 days in 2013,  
610 by means of idTracker software version 2.1 [33], producing 11 data files with the position  
611 (in pixels) of each fish in each frame, with a time step of  $\Delta t = 0.04$  s (corresponding  
612 to images taken with a frequency of 25 fps). Data were located in a rectangle of size  
613  $[471.23, 1478.48] \times [47.949, 1002.68]$  containing the circular tank of diameter 50 cm. The  
614 conversion factor from pixels to meters is  $0.53 \times 10^{-3}$  m/pix. The origin of coordinates  
615  $T(0, 0)$  is set to the center of the tank (Fig. 1).

616 We found that trajectory tracking was satisfactorily accurate. However, fish were  
617 often misidentified, making impossible the direct use of the data provided by the tracking  
618 system. We thus implemented a procedure of identity reassignment that provided us  
619 with the proper individual trajectories. In short, the procedure is a kind of bubble  
620 sort algorithm where fish identities are successively reassigned in such a way that the  
621 coordinates of each fish at the next time step are the closest ones to the coordinates  
622 they had at the previous time. That is, the fish  $i$  at time  $t$  is assigned the coordinates  
623 of fish  $j$  at time  $t + \Delta t$  that minimize the distance covered by the 5 fish.

624 Data were then grouped in a single file, counting 1.077.300 times, *i.e.*, almost 12 hours  
625 where the position of each fish is known. Then, times where at least one fish freezes  
626 were removed. Fish often remain stationary. We considered that a fish is at rest when  
627 the distance covered in 60 frames is smaller than 30 pixels, that is, when the mean speed  
628 is smaller than 6.6 mm/s during at least 2.4 seconds. We erased more than half of the  
629 data (around 5h 30mn remained). We then extracted the continuous sequences lasting  
630 at least 20 seconds, obtaining 293 sequences for a total duration of around 3h 10mn.  
631 This provided us with almost 16 hours of observation of single fish trajectories, as there  
632 are 5 fish, and their kicks are asynchronous.

633 Fish trajectories were then segmented according to the burst-and-coast typical be-  
634 havior of this species [14]. We used a time window of 0.2 s to find the local maxima  
635 of the velocity. These points are used to define the onset of a kick event. We detected  
636 60312 kicks, which means that a fish makes in average around 1 kick/s.

637 For statistical purposes, we assumed that, for a given trajectory, its symmetric tra-  
638 jectory with respect to the horizontal line has the same probability of occurrence [14].  
639 This allowed us to double our data set by adding the symmetric trajectories, thus reduc-  
640 ing the statistical uncertainty on quantities depending on angles (by a factor  $\sqrt{2}$ ). Note  
641 that, in the symmetric trajectory, the  $y$ -coordinate and all the angles have the opposite  
642 sign with respect to the original trajectory. Counting also the symmetric trajectories,  
643 we sum up to 120624 equiprobable kicks.

644 To calculate the heading angle of a fish at time  $t$ , we considered that the direction  
645 of motion is well approximated by the velocity vector of the fish at that time  $t$ . The  
646 heading angle  $\phi(t)$  is thus given by the angle that its velocity vector  $\vec{v} = (v_x, v_y)$  makes  
647 with the horizontal line, that is,

$$\phi(t) = \text{ATAN2}(v_y(t), v_x(t)). \quad (1)$$

648 Positive angles are measured in counter-clockwise direction and ATAN2 returns a value in  
649  $(-\pi, \pi]$ . The components of the velocity are estimated with backward finite differences,  
650 *i.e.*,  $v_x(t) = (x(t) - x(t - \Delta t))/\Delta t$  and  $v_y(t) = (y(t) - y(t - \Delta t))/\Delta t$ .

651 The robots' trajectories were extracted with a custom-made tracking software based  
652 on Kalman filter and pattern recognition technology [34]. Data were recorded every  
653  $\Delta t = 0.04$  s, and trajectories were then subjected to the same treatment.

## 654 Computational model

655 *Hemigrammus rhodostomus* performs a “burst-and-coast” swimming behavior charac-  
656 terized by sequences of sudden speed increases called “kicks” followed by quasi-passive,  
657 straight decelerations (S1 Video, S3 Video). The decisions of fish to change their head-  
658 ing are considered to occur exactly at the onset of the accelerations [14]. To reach some  
659 place, a fish changes its direction of motion while accelerating at the same time, and  
660 then slides almost straight towards the target place. Here we use the same model to  
661 control the decisions of fish in simulation and the decisions of robots.

662 The new vector position  $\vec{u}_i^{n+1}$  of an agent  $i$  (fish or robot) at time step  $n + 1$  is  
663 determined by the following discrete decision model:

$$\vec{u}_i^{n+1} = \vec{u}_i^n + l_i^n \vec{e}(\phi_i^{n+1}), \quad (2)$$

$$\phi_i^{n+1} = \phi_i^n + \delta\phi_i^n, \quad (3)$$

664 where  $l_i^n$  is the kick length of this agent at time step  $n + 1$ ,  $\vec{e}(\phi_i^{n+1})$  is the unitary vector  
665 pointing in the direction of angle  $\phi_i^{n+1}$ , and  $\delta\phi_i^n$  is the heading variation of the agent  
666 at time step  $n + 1$ , resulting from the *decision process* of the agent (Fig. 1C).

667 Two parameters have to be computed to determine a new target place: the kick  
668 length  $l_i^n$  and the variation of the heading angle  $\delta\phi_i^n$ . The kick length is sampled from  
669 the bell-shaped distribution of kick lengths obtained in our experiments of fish swimming  
670 in pairs [14], whose mean value is  $l = 7$  cm. When the new computed position of the  
671 agent would be outside of the tank, a new kick length is sampled from the distribution.  
672 The typical velocity of fish in their active periods was found to be  $v_0 = 14$  cm/s, decaying  
673 exponentially during kicks with a relaxation time  $\tau_0 = 0.8$  s. The duration of the time  
674 step  $n + 1$  is thus determined by the length of the kick and the speed of the fish [14].

675 The variation of the heading angle from one time step to another is considered to be

676 the sum of the variations induced by the environment of the agent, that is,

$$\delta\phi_i^n = \delta\phi_{w,i}^n + \delta\phi_{R,i}^n + \sum_{j=1, j \neq i}^N \delta\phi_{ij}^n, \quad (4)$$

677 where  $\delta\phi_{w,i}^n$  is the angular variation caused by static obstacles (the wall of the fish tank  
678 or the border of the robot platform),  $\delta\phi_{R,i}^n$  is a Gaussian white noise included in the  
679 spontaneous decision of the fish to change its heading, and  $\delta\phi_{i,j}^n$  is the angular variation  
680 induced by the social interaction of the focal agent  $i$  with its neighbor  $j$ .

681 Each contribution to the angle variation can be expressed in terms of decoupled  
682 functions of the instantaneous state of the agents, that is, the distance and relative ori-  
683 entation to the wall  $r_w$  and  $\theta_w$ , and the distance and relative orientation and alignment  
684 with neighbors,  $d$ ,  $\psi$  and  $\phi$ , respectively (Fig. 2A). The derivation of these functions is  
685 based on physical principles of symmetry of the angular functions and a sophisticated  
686 procedure detailed in Calovi *et al.* [14].

687 For completeness, we show these functions in S7 Fig and present here their analytical  
688 expressions with the parameter values necessary to reproduce the simulations.

- 689 • The repulsive effect of the wall is a centripetal force that depends only on the  
690 distance to the wall  $r_w$  and the relative angle of heading to the wall  $\theta_w$ . Assuming  
691 that this dependence is decoupled, *i.e.*,  $\delta\phi_w(r_w, \theta_w) = F_w(r_w) O_w(\theta_w)$ , we have:

$$F_w(r_w) = \gamma_w \exp \left[ - \left( \frac{r_w}{l_w} \right)^2 \right], \quad O_w(\theta_w) = \beta_w \sin(\theta_w) \left( 1 + 0.7 \cos(2\theta_w) \right), \quad (5)$$

692 where  $\gamma_w = 0.15$  is the intensity of the force ( $F_w(0) = \gamma_w$ ),  $l_w = 0.06$  m is the  
693 range of action, and  $\beta_w = 1.9157$  is the normalization constant of the angular  
694 function  $O_w(\theta_w)$ , so that the mean of the squared function in  $[-\pi, \pi]$  is equal to 1,  
695 that is,  $(1/2\pi) \int_{-\pi}^{\pi} O_w^2(\theta) d\theta = 1$ . All angular functions are normalized like that to  
696 simplify the direct comparison of their shape in the different interactions.

697 These parameter values are those used in the model simulations. They also appear  
698 in Table 1, together with the values used in the experiments with robots.

- 699 • The random variation of heading  $\delta\phi_R$  depends on the distance to the wall  $r_w$ , as  
700 the interaction with the wall dominates the random heading variation when the  
701 individual is close to the wall. Thus, we write

$$\delta\phi_R(r_w) = \gamma_R \left( 1 - \alpha \exp \left[ - \left( \frac{r_w}{l_w} \right)^2 \right] \right) g, \quad (6)$$

702 where  $\gamma_R = 0.45$ ,  $\alpha = 2/3$ , and  $g$  is a random number sampled from a normal  
703 distribution (0 mean, 1 st. dev.). Random variations are minimal at the border,  
704 where  $r_w = 0$ ,  $\delta\phi_R = \gamma_R(1 - \alpha)g$ , and become larger as the individual moves away  
705 from the border, *i.e.*, as  $r_w$  grows. Far from the border, the exponential goes to  
706 zero and  $\delta\phi_R = \gamma_R g$ .

- 707 • We assume that the interaction between agents can be decomposed into two terms  
708 of attraction and alignment which depend only on the relative state of both inter-  
709 acting agents:  $\delta\phi_{ij}(d_{ij}, \psi_{ij}, \phi_{ij}) = \delta\phi_{Att}(d_{ij}, \psi_{ij}, \phi_{ij}) + \delta\phi_{Ali}(d_{ij}, \psi_{ij}, \phi_{ij})$ , where  
710  $d_{ij}$  is the distance between fish  $i$  and fish  $j$ ,  $\psi_{ij}$  is the angle with which fish  $i$   
711 perceives fish  $j$ , and  $\phi_{ij} = \phi_j - \phi_i$  is the difference of heading or alignment.

712 We thus define the **influence** of a neighbor  $j$  on a focal individual  $i$  as the absolute  
713 contribution of the neighbor to the instantaneous heading change of the focal  
714 individual  $\delta\phi_i(t)$  in Eq. (4), that is, for  $j = 1, \dots, N, j \neq i$ :

$$\mathcal{I}_{ij}(t) = |\delta\phi_{Att}^{ij}(t) + \delta\phi_{Ali}^{ij}(t)|. \quad (7)$$

715 We assume that both the attraction and the alignment functions can be decoupled.  
716 Thus, we have  $\delta\phi_{Att}(d_{ij}, \psi_{ij}, \phi_{ij}) = F_{Att}(d_{ij}) O_{Att}(\psi_{ij}) E_{Att}(\phi_{ij})$ , where

$$F_{Att}(d) = \gamma_{Att} \left( \frac{d}{d_{Att}} - 1 \right) \frac{1}{1 + (d/l_{Att})^2}, \quad (8)$$

$$O_{Att}(\psi) = \beta_{Att} \sin(\psi) (1 - 0.33 \cos(\psi)), \quad (9)$$

$$E_{Att}(\phi) = \lambda_{Att} (1 - 0.48 \cos(\phi) - 0.31 \cos(2\phi)). \quad (10)$$

717 Here  $d_{Att} = 3$  cm is the distance at which the short-range repulsion of individual  
718 collision avoidance balances the long-range repulsion,  $\gamma_{Att} = 0.12$  is the intensity  
719 of the interaction, and  $l_{Att} = 20$  cm its range of action. The angular functions  
720  $O_{Att}$  and  $E_{Att}$  are respectively normalized with  $\beta_{Att} = 1.395$  and  $\lambda_{Att} = 0.9326$ .

721 In the alignment, we have  $\delta\phi_{Ali}(d_{ij}, \psi_{ij}, \phi_{ij}) = F_{Ali}(d_{ij}) E_{Ali}(\psi_{ij}) O_{Ali}(\phi_{ij})$ , where

$$F_{Ali}(d) = \gamma_{Ali} \left( \frac{d}{d_{Ali}} + 1 \right) \exp \left[ - \left( \frac{d}{l_{Ali}} \right)^2 \right], \quad (11)$$

$$E_{Ali}(\psi) = \beta_{Ali} (1 + 0.6 \cos(\psi) - 0.32 \cos(2\psi)), \quad (12)$$

$$O_{Ali}(\phi) = \lambda_{Ali} \sin(\phi) (1 + 0.3 \cos(2\phi)), \quad (13)$$

722 with  $d_{Ali} = 6$  cm,  $l_{Ali} = 20$  cm,  $\gamma_{Ali} = 0.09$ ,  $\beta_{Ali} = 0.9012$ ,  $\lambda_{Ali} = 1.6385$ .

723 The parameter values given in the text are those derived in [14] for the simulation  
724 model when fish swim in pairs. More details of the model, including the derivation of  
725 the above functions, can be found in [14].

## 726 Computational model in an unbounded space

727 Model simulations of agents swimming in an unbounded space were carried out by  
728 removing the interaction with the wall (*i.e.*, by setting  $\gamma_w = 0$ ; the rest of parameter  
729 values being those given in Table 1.

730 For each strategy of interaction, that is, paying attention to the  $k$  most influential  
731 neighbors or to the  $k$ -nearest neighbors, for  $k = 1, 2, 3$  and 4, and the case where agents  
732 do not interact with each other ( $k = 0$ ), group cohesion is averaged over a large number  
733 of simulation runs  $n$ :  $\langle C(t) \rangle = (1/n) \sum_{i=1}^n C_i(t)$ , where  $C_i(t)$  is the group cohesion  
734 at time  $t$  in the  $i$ -th run. We used  $n = 1000$ . The duration of each simulation was  
735 sufficiently long to produce a total number of  $10^4$  kicks per run among the 5 agents  
736 ( $\sim 2.7$  hours). A second series of simulations was carried out to produce  $5 \times 10^4$  kicks  
737 ( $\sim 13.5$  hours), finding the same qualitative results. Initial conditions of each run were  
738 always different, with all agents located at less than  $R = 25$  cm (the radius of the arena)  
739 from the origin of coordinates.

740 Three methods were considered to analyze the effect of reducing the attraction range:  
741 *i*) truncating the attraction intensity function  $F_{Att}$  to zero when the neighboring agent  
742 is further than a distance  $d_{cut}$  from the focal agent,  $F_{Att} = 0$  if  $d_{ij} > d_{cut}$ ; *ii*) varying  
743 the interaction range  $l_{Att}$ , and *iii*) varying the distance at which  $F_{Att}(d)$  reaches its



744 maximum but preserving the value of the maximum. We found that the three methods  
745 gave rise to the same qualitative result and report here only the results of the first one.

746 For each value of  $d_{\text{cut}}$ , we calculated the mean cohesion as the average over the last  
747 10% of kicks over the 1000 runs carried out to obtain  $\langle C(t) \rangle$ , and this, for each strategy  
748 and each value of  $k$ . When  $d_{\text{cut}}$  is sufficiently large, the attraction range is sufficiently  
749 long and  $\langle C(t) \rangle$  is close to the value corresponding to the mean cohesion of the group  
750 when  $F_{\text{Att}}$  is not truncated. When  $d_{\text{cut}}$  is excessively small, the attraction range is so  
751 short that the agents simply diffuse and  $\langle C(t) \rangle$  grows until the value corresponding to  
752 the case where there is no interaction between agents is reached. Both ranges of  $d_{\text{cut}}$   
753 are separated by a critical value  $d_{\text{cut}}^*$ , whose precise value depends on the duration of  
754 the realizations, *i.e.*, on the number of kicks, that we fixed to  $10^4$  for Fig. 10.

## 755 Implementation of the behavioral model in the robots

756 We designed an Object-Oriented Programming software tool (OOP) for the distributed  
757 control of the Cuboids robots (Fig. 13). It first establishes independent memories for  
758 each robot as an agent to store their real time information, such as robot ID, location  
759  $\vec{u}^n(x^n, y^n)$  and heading  $\phi^n$  at time step  $n$ , and position of the target place  $\vec{u}^{n+1}$  at time  
760 step  $n + 1$ . The OOP software provides a state machine control structure to generate  
761 for each individual robot the position of their target place and then it dispatches the  
762 control signals to the robots. With the new target place determined by the proposed  
763 strategy, the actuators of the robot are controlled wirelessly by WIFI signals sent by the  
764 computer. The robot controls its wheels to move towards the new target place while  
765 LED colors display the state of the robot.

766 Robots use a constant kick length of around 8 cm, that is, twice the body length of  
767 a robot, which corresponds to the mean kick length measured in experiments with five  
768 fish. Using a constant straight step also allows to check if the new target place can be  
769 reached or not, in particular, to prevent the case where the agent could be intercepted by  
770 another agent, in which case the distance traveled by the agent will be shorter than  $l_i^n$ .

771 The distributed control structure was designed to test the different local interaction  
772 strategies among the robot. The decision structure for an individual robot includes two  
773 main states: COMPUTE state and MOVE state (Fig. 14).

774 The robots are programmed to perform a burst-and-coast movement mimicking the  
775 swimming mode of the fish. When a robot is in the COMPUTE state it computes a  
776 new target place based on the current local interaction strategy. After that, the robot  
777 switches to the MOVE state, where the robot adjusts its wheels to move towards the  
778 target place. Since other robots are moving around asynchronously, the robot must  
779 avoid these dynamic obstacles while being in the MOVE state. To prevent collisions  
780 between robots, we designed and implemented an obstacle avoidance protocol. When  
781 no valid targets can be generated during the COMPUTE state (due to the impediment  
782 imposed by nearby robots), the robot generates a valid target place by means of a  
783 scanning method and, alternatively, just moves back a short distance.

784 We describe below the two states and the additional procedures used to avoid collisions  
785 with dynamical obstacles.

- 786 • COMPUTE State: This state generates a new target place for the focal robot by  
787 means of the proposed strategies, which are programmed in MATLAB. In this  
788 state, the robot takes the information about its local environment and selects the  
789 neighbors to be taken into account corresponding to the current local interaction  
790 strategy. Then the robot computes the variation of its heading angle according to  
791 the computational model and determines a new place target. The new target place  
792 is then checked and validated by the OOP software so as to avoid any collision

793 with static obstacles, before the robot switches to the MOVE state (see Fig. 14).  
794 While a robot is in the COMPUTE State, the white LED light is turned on.

- 795 • MOVE State: In this state the robot evaluates whether its heading angle is aligned  
796 with the new pace target. If the deviation is too large, the robot first rotates  
797 towards the target and then moves straight until it reaches the target. Then,  
798 when the robot successfully reaches the target, it returns to the COMPUTE state  
799 to determine a new target place. While a robot is in the MOVE State, the green  
800 LED light is turned on.
- 801 • Obstacle Avoidance Protocol: This procedure is triggered as soon as the target  
802 path of the focal robot crosses the safety zone of another robot. The safety zone  
803 is a circular area around a robot with diameter of 80 mm. In this case, the focal  
804 robot first stops and computes whether it can continue moving or not according  
805 to the information it has about the distance  $d$  and relative angular position  $\psi$   
806 of the neighboring robot. If the focal robot has the moving priority (determined  
807 by a large value of the angle of perception,  $\psi > 90^\circ$ , meaning that the robot is  
808 “behind”), or if the distance is larger than the diameter of the circle of security  
809 ( $d > 80$  mm, meaning that the robot sufficiently far), the moving condition is  
810 satisfied and the focal robot successfully turns back into the MOVE state. If not,  
811 the focal robot repeatedly checks the values  $d$  and  $\psi$  of the neighboring robot  
812 until the moving condition is satisfied. If the focal robot cannot go back into the  
813 MOVE state within 3 seconds, it toggles to the COMPUTE state to determine a  
814 new target place.
- 815 • No Valid Target Procedure: This procedure is triggered when the robot is in the  
816 COMPUTE state and cannot generate a valid target place within 3 seconds. In  
817 this situation, the robot scans the local environment from its front to the nearest  
818 neighbor located at one of its sides. If there exists a free space for generating a  
819 target place, the robot toggles to the MOVE state. If, after scanning, no free space  
820 is available for moving, the robot moves back over a predefined distance of 80 mm  
821 (approximately two robot body lengths) and then turns into the COMPUTE state  
822 to determine a new target place.

## 823 Local interactions strategies

824 In order to coordinate their motion with those of its neighbors, agents and robots have  
825 to select the relevant neighbors with which they interact, then compute the effect of  
826 social interactions, and finally sum up these effects to get the resultant heading angle  
827 variation.

828 In a group of 5 agents, there exist many ways for an agent to select the influential  
829 neighbors. We investigated the impact of three different strategies for an agent to  
830 interact with  $k$  of its  $N - 1 = 4$  neighbors. A first strategy consists in selecting the  
831 neighbors according to their distance to the focal agent. A second strategy, included  
832 in our study as a control or a null strategy, consists in choosing randomly  $k$  neighbors  
833 to interact with. The third strategy consists in interacting with the agents that have  
834 the largest influence on the focal agent, where the influence is defined by the absolute  
835 contribution of the neighbor to the total heading variation of the focal agent, that is,  
836 the largest value of  $|\delta\phi_{ij}|$ ; see equation (7).

837 For each kind of strategy, we consider that the focal individual can interact with  
838  $k = 1, 2$  or  $3$  neighbors. We also considered the case where agents interact with all the  
839 other individuals ( $k = 4$ ), and finally, we tested the condition in which there is no social  
840 interaction between agents (*i.e.*, no attraction nor alignment, only collision avoidance  
841 in robots), a situation that corresponds to a null model ( $k = 0$ ) with respect to social

842 interactions. For each combination of interactions, we performed 50 simulations for a  
 843 total of  $8 \times 10^4$  kicks for all the 5 agents (about 21 hours per condition) and 1 robotic  
 844 experiment with about 8000 kicks in average for all the 5 robots (about 1 hour per  
 845 condition).

## 846 Quantification of collective behavior

847 We characterize the collective behavioral patterns by means of six quantities relative  
 848 to the behavior of the group in the tank and to the behavior of individuals inside the  
 849 group. To do that, we first write the coordinates of the position  $\vec{u}_B = (x_B, y_B)$  and the  
 850 velocity  $\vec{v}_B = (v_B^x, v_B^y)$  of the point  $B$  corresponding to the center of mass or barycenter  
 851 of the group with respect to the reference system of the tank. That is,

$$x_B(t) = \frac{1}{N} \sum_{i=1}^N x_i(t), \quad v_B^x(t) = \frac{1}{N} \sum_{i=1}^N v_i^x(t). \quad (14)$$

852 We omit the expressions of  $y_B$  and  $v_B^y$  because they are identical. The heading of the  
 853 barycenter is then given by  $\phi_B = \text{ATAN2}(v_B^y, v_B^x)$ .

854 The barycenter defines a system of reference in which the relative position and  
 855 velocity of a fish, that we denote with a bar, are such that  $\bar{x}_i = x_i - x_B$  and  $\bar{v}_{x,i} =$   
 856  $v_{x,i} - v_{x,B}$  (same expressions for the  $y$ -components). In the reference system of the  
 857 barycenter, the angle of the position of a fish is given by  $\bar{\theta}_i = \text{ATAN2}(\bar{y}_i, \bar{x}_i)$ , so the  
 858 relative heading in this reference system is  $\bar{\phi}_i = \text{ATAN2}(\bar{v}_{y,i}, \bar{v}_{x,i}) \neq \phi_i - \phi_B$ . We can  
 859 thus define the angle of incidence of a fish with respect to a circle centered in the  
 860 barycenter as  $\bar{\theta}_{w,i} = \bar{\phi}_i - \bar{\theta}_i$ . The angle  $\bar{\theta}_{w,i}$  is the equivalent to the angle of incidence  
 861 to the wall  $\theta_{w,i}$  that we use in the reference system of the tank, and serves to measure  
 862 the angular velocity of a fish with respect to the barycenter, in the reference system of  
 863 the barycenter.

864 The six quantities are thus defined as follows:

- 865 1. Group cohesion  $C(t) \in [0, R]$ :

$$C(t) = \sqrt{\frac{1}{N} \sum_{i=1}^N \|\vec{u}_i - \vec{u}_B\|^2}, \quad (15)$$

866 where  $\|\vec{u}_i - \vec{u}_B\|$  is the distance from fish  $i$  to the barycenter  $B$  of the  $N$  fish.

867 Low values of  $C(t)$  correspond to highly cohesive groups, while high values of  $C(t)$   
 868 denote that individuals are spatially dispersed.

- 869 2. Group polarization  $P(t) \in [0, 1]$ :

$$P(t) = \frac{1}{N} \left\| \sum_{i=1}^N \vec{e}_i(t) \right\|, \quad (16)$$

870 where  $\vec{e}_i = \vec{v}_i / \|\vec{v}_i\| = (\cos(\phi_i), \sin(\phi_i))$  is the unit vector in the direction of motion  
 871 of the individual fish, given by its velocity vector  $\vec{v}_i$ .

872 The polarization is thus the norm of the resultant of  $N$  vectors. A value of  $P$  close  
 873 to 1 would mean that the  $N$  vectors are aligned and point in the same direction,  
 874 while a value of  $P$  close to 0 would mean that the  $N$  vectors point in different  
 875 directions, but can also mean that vectors are collinear and with opposite direction  
 876 (*e.g.*, for  $N$  even, half of the vectors point North, the other half point South) so  
 877 that they cancel each other. Similarly, when  $N = 5$  and two normalized velocity

878 vectors cancel each other (*e.g.*, when 4 fish swim in the same direction  $\vec{e}$  and one  
879 fish swims in the opposite direction  $-\vec{e}$ ) would give rise to a resultant vector of  
880 norm  $P = (4 \times 1 - 1)/5 = 3/5 = 0.6$ , and if two pairs of fish cancel each other,  
881 then  $P = (3 \times 1 - 2 \times (-1))/5 = 1/5 = 0.2$ .

882 3. Mean distance to the wall  $\langle r_w \rangle(t) \in [0, R]$ :

$$\langle r_w \rangle(t) = \frac{1}{N} \sum_{i=1}^N r_{w,i}(t), \quad (17)$$

883 Note that when the individuals move in a cohesive group,  $\langle r_w \rangle$  is typically of the  
884 same order as the distance of the barycenter to the wall  $r_{w,B}$ .

885 4. Relative angle of the barycenter heading to the wall  $\theta_{w,B}(t) \in [-\pi, \pi]$ :

$$\theta_{w,B}(t) = \text{ATAN2}(v_{y,B}(t), v_{x,B}(t)). \quad (18)$$

886 5. Index of rotation  $\Gamma(t) \in [-1, 1]$  around the center of the tank  $T$ :

$$\Gamma(t) = \frac{1}{N} \sum_{i=1}^N \sin(\theta_{w,i}(t)). \quad (19)$$

887 The index of rotation of a single fish with respect to the center of the tank is given  
888 by the relative angle with the wall  $\theta_{w,i}$ . In fact,  $\theta_{w,i} > 0$  means that the fish is  
889 swimming counter-clockwise (CCW) with respect to the center of the tank, and  
890  $\theta_{w,i} < 0$  means that the fish is swimming clockwise (CW). Thus,  $\Gamma(t)$  is actually  
891 the mean index of rotation of the group: if  $\Gamma(t) > 0$  then the group is rotating  
892 CCW, and if  $\Gamma(t) < 0$  then rotation is CW.

893 Fish swim most of the time parallel to the wall, so that  $\Gamma(t)$  is the mean of  
894  $N$  values that are most of the time close to  $+1$  (but below) or  $-1$  (but above). As  
895 happened for  $P(t)$ , fish can cancel each other: for instance, 4 fish swimming CWW  
896 and 1 CW would give  $\Gamma = 0.6$ , while 2 CWW and 3 CW would give  $\Gamma = -0.2$ .  
897 We have preserved the information given by the sign in order to track the number  
898 of changes of direction of the group.

899 6. Index of collective counter-milling and super-milling  $Q(t) \in [-1, 1]$ :

$$Q(t) = \left( \frac{1}{N} \sum_{i=1}^N \sin(\bar{\theta}_{w,i}(t)) \right) \times \text{SIGN} \left( \frac{1}{N} \sum_{i=1}^N \sin(\theta_{w,i}(t)) \right) \quad (20)$$

$$= \Gamma_B(t) \times \text{SIGN}(\Gamma(t)). \quad (21)$$

900 A group of fish rotating around the center of the tank with a rotation index  $\Gamma(t)$   
901 would display a counter-milling behavior if the individual fish also rotate around  
902 the barycenter of the group they form and both directions of rotation are opposite.  
903 The first sum between parentheses in (20) is the index of rotation of fish with respect  
904 to the barycenter of the group, denoted by  $\Gamma_B(t)$  in (21). Multiplying by the  
905 sign of  $\Gamma(t)$  means that when  $Q(t) < 0$  then both directions are opposite and fish  
906 exhibit a *collective counter-milling behavior*, while when  $Q(t) > 0$ , both rotations  
907 are in the same direction and fish exhibit a *collective super-milling behavior*.

908 Thus, a group of 5 individuals turning around the center of the tank in a rigid  
909 formation that always points North, like the fingertips of the hand when cleaning  
910 a window, would correspond to a counter-milling behavior. In turn, a situation

911 where individuals rotate around the center of the tank as if they were fixed to a  
912 vinyl record, so that trajectories are perfect circles and individuals far from the  
913 center of the tank move faster than those close to the center, would correspond to  
914 a zero-milling state; what fish do is something in-between (see Fig. 3 for fish, and  
915 S4 Video for robots).

916 Collective behavior is thus quantified by means of the probability density functions  
917 of these quantities. In addition, density maps are used to illustrate the variation of po-  
918 larization and rotation index with respect to cohesion. We consider two normalizations:  
919 *i*) with the total number of data, to highlight the significant regions of the map and  
920 neglect the regions where the data are scarce, and *ii*) with the total number of data in  
921 a range of the polarization or the rotation index (*i.e.*, each row in the map is a PDF).  
922 Spatial distances are scaled with the corresponding values of  $\lambda_M = 0.87$  and  $\lambda_R = 0.35$ ,  
923 and we also calculated two versions of the rotation index, with and without adding  
924 specular trajectories.

## 925 Acknowledgments

926 L.L. was supported by a grant from the Natural Science Foundation of Shanghai under  
927 grant No. 17ZR1419000. This study was supported by grants from the Centre National  
928 de la Recherche Scientifique (CNRS) and University Paul Sabatier (project Dynabanc).

## 929 References

- 930 1. D.J.T. Sumpter (2010). *Collective Animal Behavior*. Princeton, NJ: Princeton  
931 University Press.
- 932 2. I.D. Couzin (2002). Collective cognition in animal groups. *Trends in Cognitive*  
933 *Science*, 13(1):36433.
- 934 3. M. Moussaïd, S. Garnier, G. Theraulaz and D. Helbing (2009). Collective infor-  
935 mation processing in swarms, flocks and crowds. *Topics in Cognitive Science* 1,  
936 469–497.
- 937 4. S. Camazine, J.L. Deneubourg, N. Franks, J. Sneyd, G. Theraulaz and  
938 E. Bonabeau (2001). *Self-Organization in Biological Systems*. Princeton, NJ:  
939 Princeton University Press.
- 940 5. I.D. Couzin and J. Krause (2003). Self-organization and collective behavior in  
941 vertebrates. *Advances in the Study of Behavior* 32: 1–75.
- 942 6. U. Lopez, J. Gautrais, I.D. Couzin and G. Theraulaz (2012). From behavioural  
943 analyses to models of collective motion in fish schools. *Interface Focus* 2:693-707.
- 944 7. A. Cavagna, A. Cimorelli, I. Giardina, G. Parisi, R. Santagati, F. Stefanini and  
945 R. Tavarone (2010). From empirical data to inter-individual interactions: unveil-  
946 ing the rules of collective animal behavior. *Mathematical Models and Methods*  
947 *in Applied Sciences* 20:1491–1510.
- 948 8. D.J.T. Sumpter (2006). The principles of collective animal behaviour. *Philoso-*  
949 *phical Transactions of the Royal Society B: Biological Sciences* 361 (1465):5–22.
- 950 9. T. Sasaki and S.C. Pratt (2018). The Psychology of Superorganisms: Collective  
951 Decision Making by Insect Societies. *Annual Review of Entomology* 63:259–275.

- 952 10. C. Detrain and J.L. Deneubourg (2006). Self-organized structures in a superor-  
953 ganism: Do ants “behave” like molecules? Physics of Life Reviews 3(3):162–187.
- 954 11. C. Detrain and J.L. Deneubourg (2008). Collective decision-making and foraging  
955 patterns in ants and honeybees. Advances in Insect Physiology 35:123–173.
- 956 12. T.D. Seeley (1996). *Wisdom of the Hive*. Cambridge, MA: Harvard Univ. Press.
- 957 13. T.D. Seeley (2010). *Honeybee Democracy*. Princeton, NJ: Princeton Univ. Press.
- 958 14. D.S. Calovi, A. Litchinko, V. Lecheval, U. Lopez, A. Pérez Escudero, H. Chaté,  
959 C. Sire, G. Theraulaz (2018). Disentangling and modeling interactions in fish  
960 with burst-and-coast swimming reveal distinct alignment and attraction behav-  
961 iors. PLoS Comput. Biol. 14(1):e1005933.
- 962 15. J.K. Parrish, S.V. Viscido and D. Grunbaum (2002). Self-organized fish schools:  
963 An examination of emergent properties. Biological Bulletin 202:296–305.
- 964 16. T. Vicsek and A. Zafeiris (2012). Collective motion. Physics Reports 517: 71–14.
- 965 17. I. Aoki (1982). A simulation study on the schooling mechanism in fish. Bull. J.  
966 Soc. Sci. Fish 48(8):1081–1088.
- 967 18. I. D. Couzin, J. Krause, R. James, G. Ruxton and N. Franks (2002) Collective  
968 memory and spatial sorting in animal groups. J. Theor. Biol. 218(5):1–11.
- 969 19. T. Vicsek, A. Czi rok, E. Ben-Jacob, I. Cohen and O. Shochet (1995). Novel Type  
970 of Phase Transition in a System of Self-Driven Particles. Physical Review Letters  
971 75: 226–1229.
- 972 20. M. Ballerini et al.(2008). Interaction Ruling Animal Collective Behavior Depends  
973 on Topological Rather than Metric Distance: Evidence from a Field Study. Proc.  
974 Natl. Acad. Sci. USA 105:1232-1237.
- 975 21. M. Camperi, A. Cavagna, I. Giardina, G. Parisi and E. Silvestri (2012). Spa-  
976 tially balanced topological interaction grants optimal cohesion in flocking models.  
977 Interface Focus 2:715–725.
- 978 22. J. Gautrais *et al.* (2012). Deciphering interactions in moving animal groups. PLoS  
979 Comp. Biol. 8(9):e1002678.
- 980 23. A. Strandburg-Peshkin, D.R. Farine, I.D. Couzin and M.C. Crofoot (2015).  
981 Shared decision-making drives collective movement in wild baboons. Science  
982 348:1358–1361.
- 983 24. B.H. Lemasson, J.J. Anderson and R.A. Goodwin (2009). Collective motion in  
984 animal groups from a neurobiological perspective: the adaptive benefits of dy-  
985 namic sensory loads and selective attention. Journal of Theoretical Biology  
986 261(4):501–510.
- 987 25. B.H. Lemasson, J.J. Anderson and R.A. Goodwin (2013). Motion-guided atten-  
988 tion promotes adaptive communication during social navigation. Proceedings of  
989 the Royal Society of London B: Biological Sciences 280(1754):20122003.
- 990 26. A.M. Calvao and E. Brigatti (2014). The Role of Neighbours Selection on Cohe-  
991 sion and Order of Swarms. PLoS ONE 9(5): e94221.

- 992 27. L. Jiang, L. Giuggioli, A. Perna, R. Escobedo, V. Lecheval, C. Sire, Z. Han and  
993 G. Theraulaz (2017). Identifying influential neighbors in animal flocking. PLoS  
994 Comput. Biol. 13:e1005822.
- 995 28. Y. Katz, K. Tunstrøm, C. Ioannou, C. Huepe and I. D. Couzin (2011). Inferring  
996 the structure and dynamics of interactions in schooling fish. Proc. Natl. Acad.  
997 Sci. USA 108(46):18720–18725.
- 998 29. A.E. Turgut, H. Çelikkanat, F. Gökçe and E. Şahin (2008). Self-organized flocking  
999 in mobile robot swarms. Swarm Intelligence 2:97–120.
- 1000 30. C. Muro, R. Escobedo, L. Spector and R.P. Coppinger (2011). Wolf-pack (*Canis*  
1001 *lupus*) hunting strategies emerge from simple rules in computational simulations.  
1002 Behav. Processes 88(3):192–197.
- 1003 31. R. Dukas (2002). Behavioural and ecological consequences of limited attention.  
1004 Phil. Trans. R. Soc. Lond. B 357:1539–1547.
- 1005 32. C. Reynolds (1987). Flocks, herds and schools: A distributed behavioral model.  
1006 Computer Graphics 21(4) (SIGGRAPH '87 Conference Proceedings), pp. 25–34.
- 1007 33. A. Pérez-Escudero, J. Vicente-Page, R.C. Hinz, S. Arganda, and G.G. de  
1008 Polavieja (2014). idTracker: tracking individuals in a group by automatic identi-  
1009 fication of unmarked animals. Nature Methods, 11:743–748.
- 1010 34. J. Goncalves, J. Lima and P. Costa (2008). Real-time localization of an omnidi-  
1011 rectional mobile robot resorting to odometry and global vision data fusion: An  
1012 EKF approach.. IEEE International Symposium on Industrial Electronics, pp.  
1013 1275–1280.
- 1014 35. X. Hu (2005). Applying robot-in-the-loop-simulation to mobile robot systems. In  
1015 Advanced Robotics, 2005. ICAR'05 Proceedings, 12th International Conference  
1016 on, pp. 506–513.

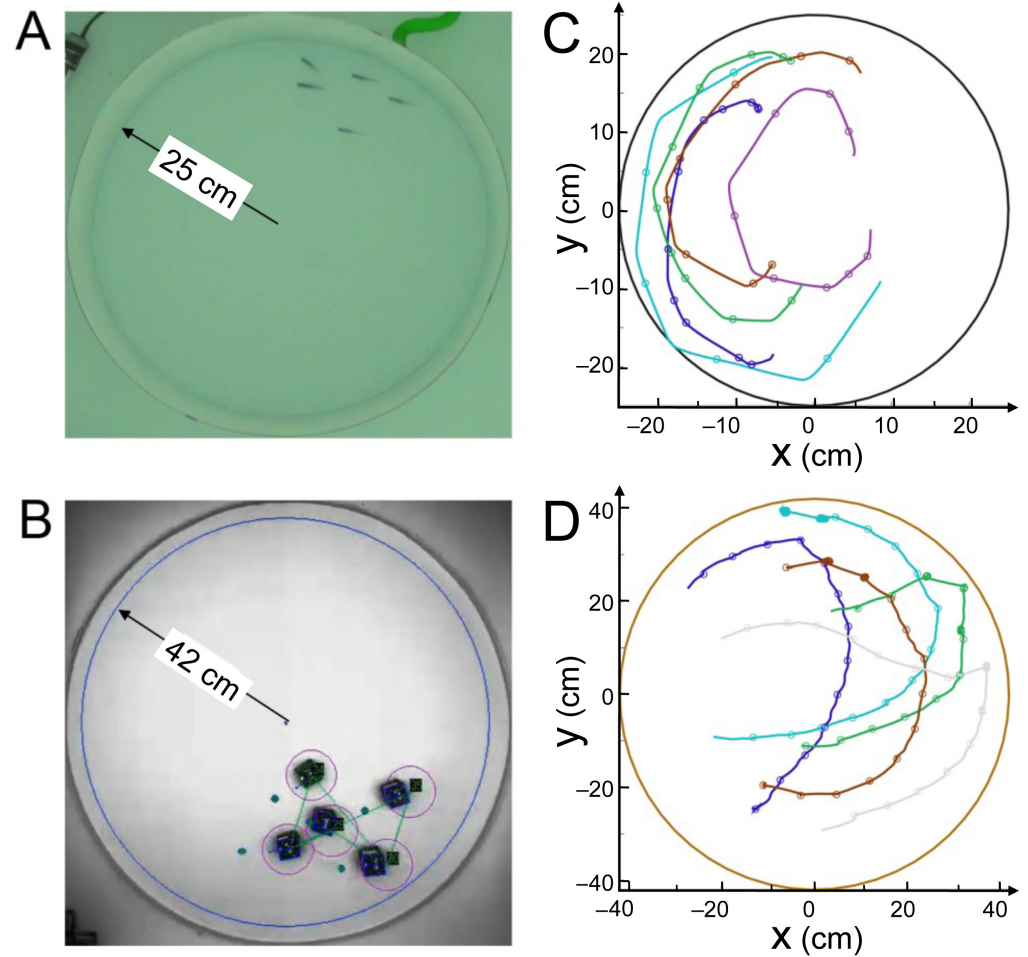

**Fig 1. Experimental setups and tracking.** (A) Experiments with 5 fish swimming in a tank of radius  $R_{\text{fish}} = 25$  cm. (B) 5 robots running in a platform of radius  $R_{\text{robot}} = 42$  cm. (C) Individual fish trajectories over 4 seconds. The circles represent the onset of bursts, when speed is minimum. (D) Individual trajectories in one robotic experiment over 24 seconds. The circles indicate the decisions of the robots to select a new target place, when individual speed is minimum.



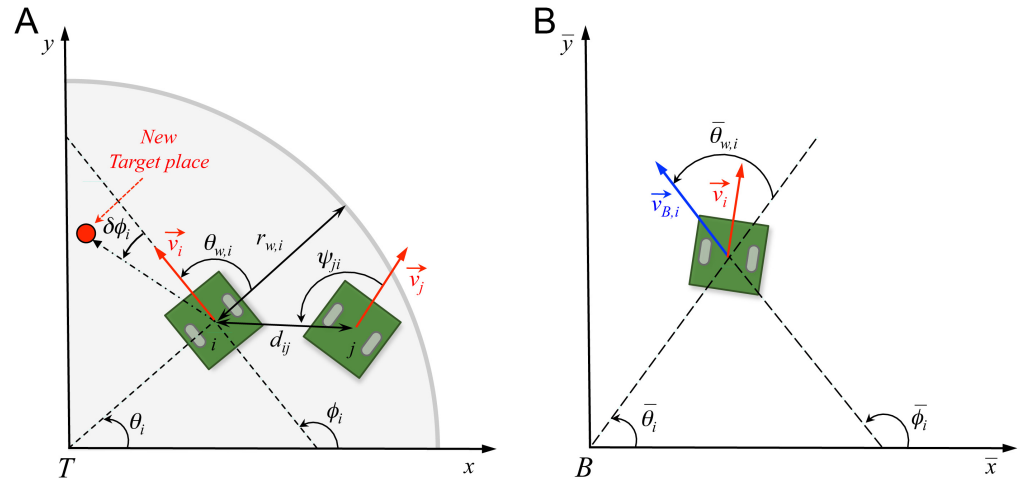

**Fig 2. Angles and reference systems.** (A) Distances, angles and velocity vectors of agents  $i$  and  $j$  in the absolute reference system centered in  $T(0,0)$ . Positive values of angles are fixed in the anticlockwise direction. Angle  $\theta_i$  is the position angle of agent  $i$  with respect to  $T$  and the horizontal line;  $r_{w,i}$  is the distance of agent  $i$  to the wall;  $\phi_i$  is the heading of agent  $i$ , determined by its velocity vector  $\vec{v}_i$ ;  $\theta_{w,i}$  is the relative angle of agent  $i$  with the wall;  $d_{ij}$  is the distance between agents  $i$  and  $j$ ;  $\psi_{ij}$  is the angle with which agent  $i$  perceives agent  $j$ ;  $\phi_{ij} = \phi_j - \phi_i$  is the difference of heading between agents  $i$  and  $j$ , and  $\delta\phi_i$  is the variation of heading of agent  $i$ . (B) Relative reference system centered in the barycenter of the group  $B(x_B, y_B)$ . Relative variables are denoted with a bar. Angle  $\bar{\theta}_{w,i} = \bar{\phi}_i - \theta_i$  is the angle of incidence of the relative speed of agent  $i$  with respect to a circle centered in  $B$ .

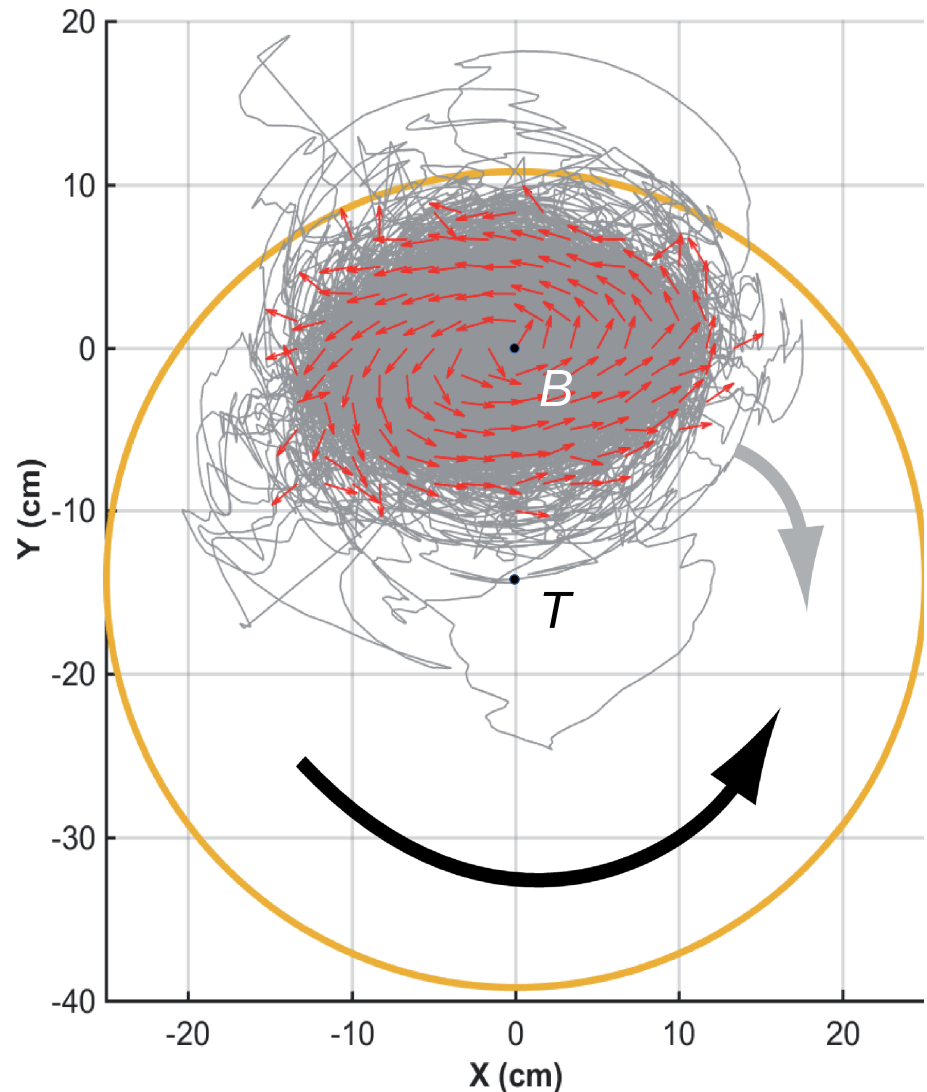

**Fig 3. Counter-milling in fish experiments.** Individual fish (small red arrows) turn counter-clockwise (CCW) around their barycenter, here located at  $B(0,0)$ , while fish group rotates clockwise (CW) around the center of the tank, located at  $T(0,-14)$  in the reference system of the barycenter. Red arrows (of same length) denote relative fish heading, gray lines denote relative trajectories, and large orange circle denotes the average relative position of the border of the tank. The wide black arrow shows the direction of rotation of individual fish with respect to  $B$  (CCW), opposed to the wide gray arrow showing the direction of rotation of the group with respect to  $T$  (CW).

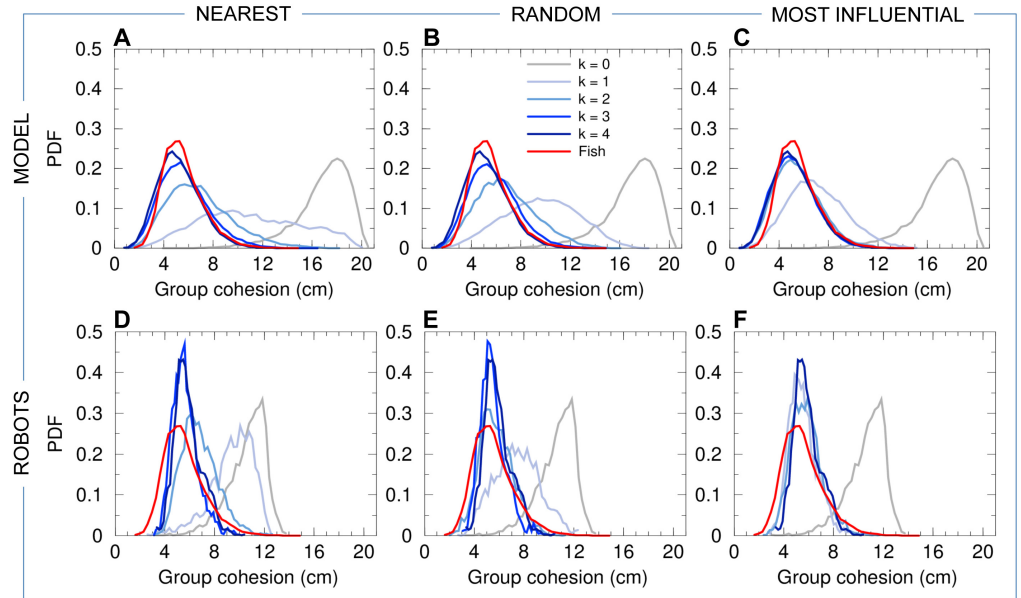

**Fig 4. Group cohesion.** Probability density functions (PDFs) of group cohesion  $C(t)$  for the experiments with fish (red lines in all panels), model simulations (panels ABC) and experiments with swarm of robots (panels DEF), compared to the corresponding null models ( $k = 0$ , no interaction between individuals) in both simulations and robots (gray lines in all panels). Units are centimeters. Curves about agents (blue and gray lines) have been scaled with  $\lambda_M = 0.87$  for the model simulations and with  $\lambda_R = 0.35$  for robots. The PDFs ( $y$ -axis) are scaled accordingly to preserve the integral of the PDF equal to 1. The intensity of blue color is proportional to the number of neighbors with whom a individual (fish or robot) interacts, from  $k = 1$  (light blue) to  $k = 4$  (dark blue). The legend about lines' style shown in panel (B) is the same for the six panels. Strategies are, from left to right: panels A and D: nearest neighbors; B and E: random neighbors; C and F: most influential neighbors.

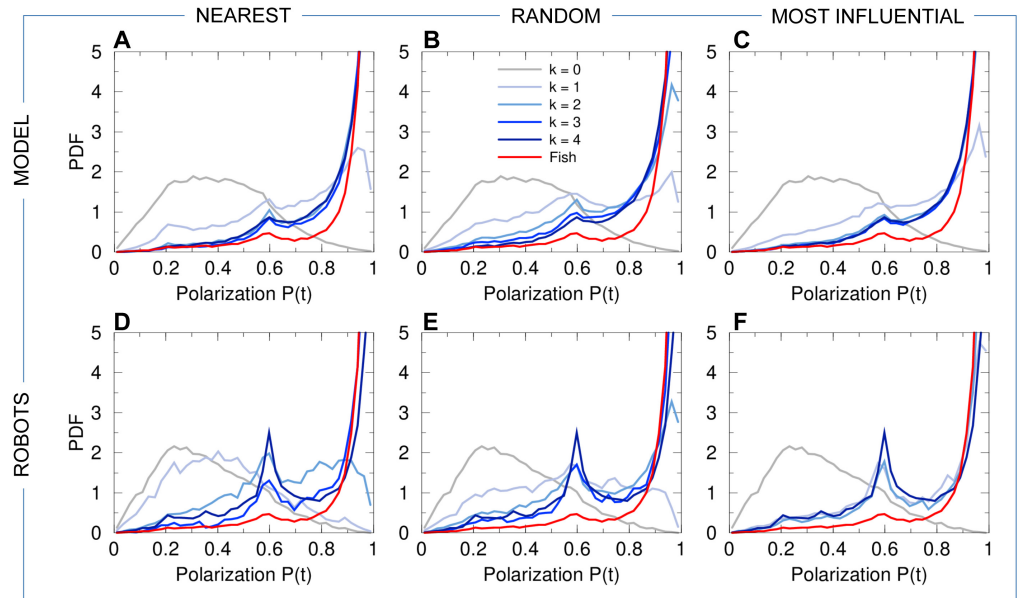

**Fig 5. Group polarization.** PDFs of group polarization  $P(t)$  for the experiments with fish (red lines in all panels), model simulations (panels ABC) and experiments with robots (panels DEF), compared to the corresponding null models ( $k = 0$ , no interaction between individuals) in both simulations and robots (gray lines in all panels). Curves about agents (model and robots) are blue and gray lines. The intensity of blue color is proportional to the number of neighbors taken into account, from  $k = 1$  (light blue) to  $k = 4$  (dark blue). The legend about lines' style shown in panel (B) is the same for the six panels. Strategies are, from left to right: panels A and D: nearest neighbors; B and E: random neighbors; C and F: most influential neighbors.

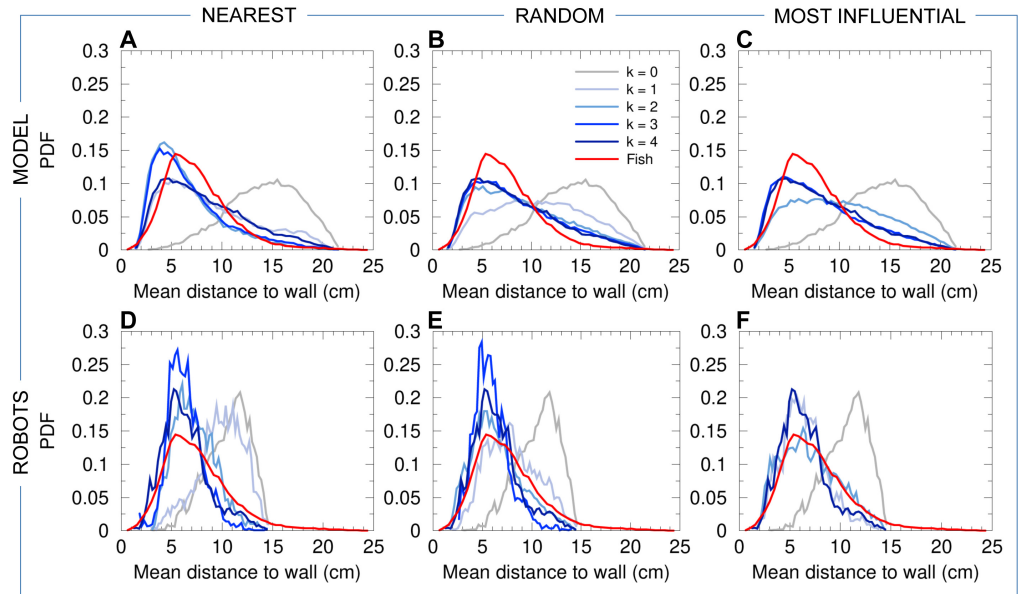

**Fig 6. Mean distance of individuals to the border.** PDFs of the mean distance of individuals to the wall  $\langle r_w \rangle$  for the experiments with fish (red lines in all panels), model simulations (panels ABC) and experiments with robots (panels DEF), compared to the corresponding null models ( $k = 0$ , no interaction between individuals) in both simulations and robots (gray lines in all panels). Units are centimeters. Curves about agents (blue and gray lines) have been scaled with  $\lambda_M = 0.87$  for the model simulations and with  $\lambda_R = 0.35$  for robots. The PDFs ( $y$ -axis) are scaled accordingly to preserve the integral of the PDF equal to 1. The intensity of blue color is proportional to the number of neighbors with whom an individual (fish or robot) interacts, from  $k = 1$  (light blue) to  $k = 4$  (dark blue). The legend about lines' style shown in panel (B) is the same for the six panels. Strategies are, from left to right: panels A and D: nearest neighbors; B and E: random neighbors; C and F: most influential neighbors.

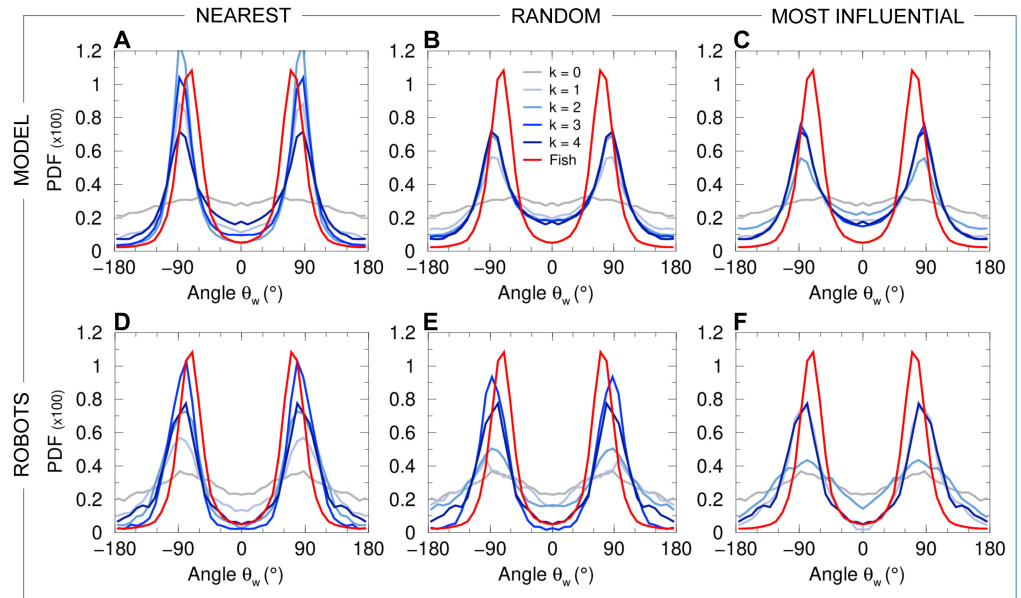

**Fig 7. Relative angle of the heading of the barycenter of the group with the wall.** PDFs of the relative angle of the heading of the barycenter of the group with the wall  $\langle \theta_w^B \rangle$  for the experiments with fish (red lines in all panels), model simulations (panels ABC) and experiments with robots (panels DEF), compared to the corresponding null models ( $k = 0$ , no interaction between individuals) in both simulations and robots (gray lines in all panels). Curves about agents (model and robots) are blue and gray lines. The intensity of blue color is proportional to the number of neighbors with whom an individual (fish or robot) interacts, from  $k = 1$  (light blue) to  $k = 4$  (dark blue). The legend about lines' style shown in panel (B) is the same for the six panels. Strategies are, from left to right: panels A and D: nearest neighbors; B and E: random neighbors; C and F: most influential neighbors.

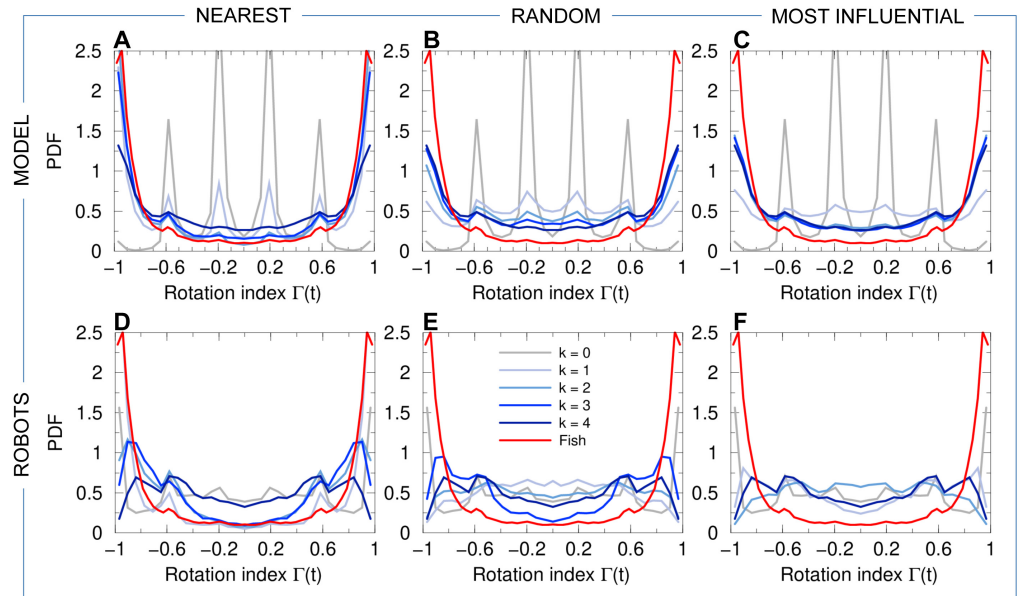

**Fig 8. Index of rotation of the group around tank center.** PDFs of rotation index  $\Gamma(t)$  for the experiments with fish (red lines in all panels), model simulations (panels ABC) and experiments with robots (panels DEF), compared to the corresponding null models ( $k = 0$ , no interaction between individuals) in both simulations and robots (gray lines in all panels). Curves about agents (model and robots) are blue and gray lines. The intensity of blue color is proportional to the number of neighbors with whom an individual (fish or robot) interacts, from  $k = 1$  (light blue) to  $k = 4$  (dark blue). The legend about lines' style shown in panel (B) is the same for the six panels. Strategies are, from left to right: panels A and D: nearest neighbors; B and E: random neighbors; C and F: most influential neighbors.

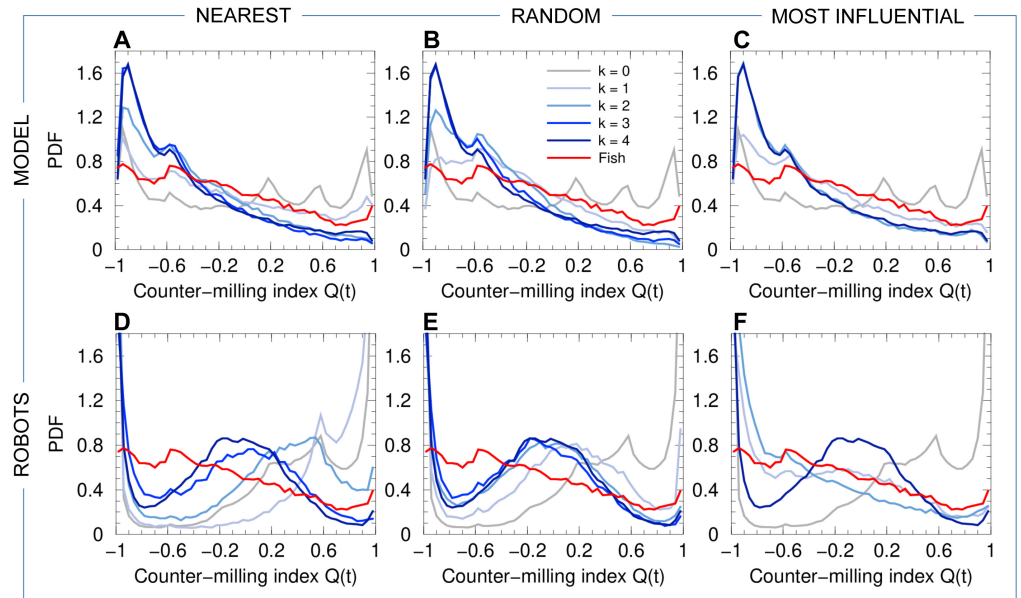

**Fig 9. Counter-milling index.** PDFs of the counter-milling index  $Q(t)$  for the experiments with fish (red lines in all panels), model simulations (panels ABC) and experiments with robots (panels DEF), compared to the corresponding null models ( $k = 0$ , no interaction between individuals) in both simulations and robots (gray lines in all panels). Curves about agents (model and robots) are blue and gray lines. The intensity of blue color is proportional to the number of neighbors taken into account, from  $k = 1$  (light blue) to  $k = 4$  (dark blue). The legend about lines' style shown in panel (B) is the same for the six panels. Strategies are, from left to right: panels A and D: nearest neighbors; B and E: random neighbors; C and F: most influential neighbors.



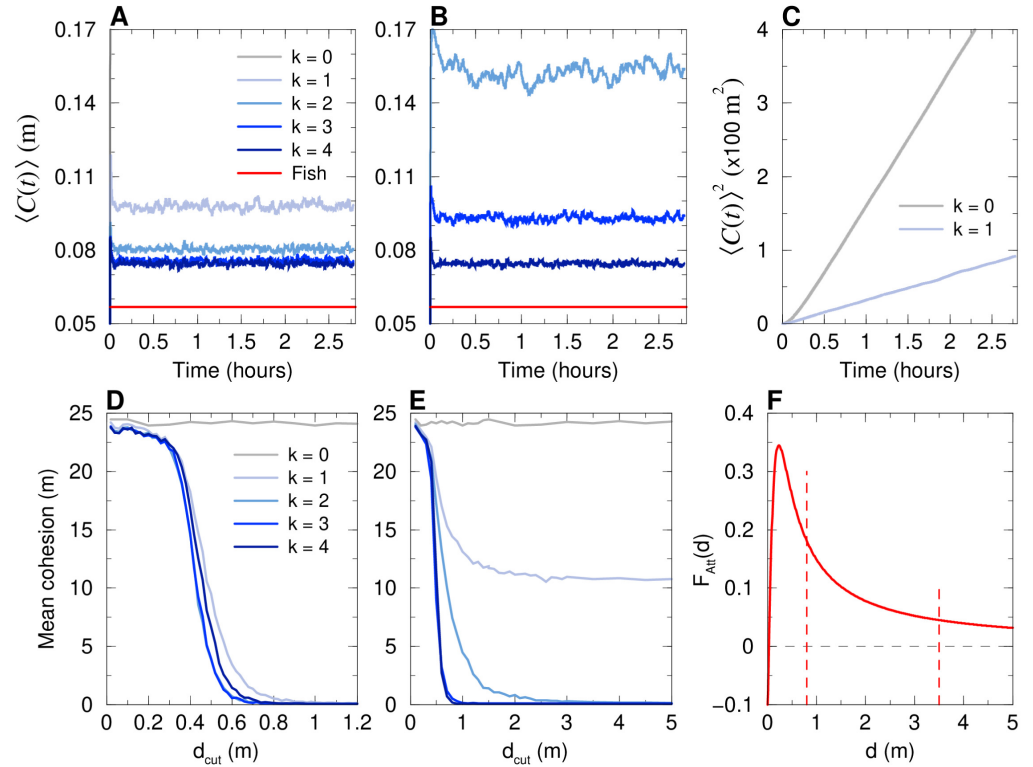

**Fig 10. Average cohesion of a group of 5 agents swimming in an unbounded space.** Model simulations of the two strategies, (AD) interacting with the  $k$  most influential neighbors, and (BCE) with the  $k$  nearest neighbors, for  $k = 1, \dots, 4$  (blue lines), together with the case with no interaction ( $k = 0$ , gray lines) and the mean cohesion of real fish in the tank (red lines in AB). (C): squared mean cohesion in the diffusive cases  $k = 1$  nearest neighbor and  $k = 0$ , in an appropriate scale. (ABC): average of 1000 runs with 10000 kicks ( $\approx 2.7$  hours) per run. (DE): Mean cohesion averaged over the last 10% of the 1000 runs for different values of the truncating distance  $d_{\text{cut}}$  for the two strategies: (D) Interacting with the most influential neighbors, and (E) with the nearest neighbors. Panel (F): Attraction function  $F_{\text{Att}}$  extended to long distances, showing the critical values of  $d_{\text{cut}}$  above which cohesion is preserved (vertical dashed lines):  $d_{\text{cut}}^* \approx 0.8$  m when the neighbors taken into account are the  $k = 1, 2$  or  $3$  most influential ones, the  $k = 3$  nearest ones or all the neighbors ( $k = 4$ ), and  $d_{\text{cut}}^* \approx 3.5$  m when interacting with the two nearest ones ( $d_{\text{cut}}^*$  doesn't exist when interacting only with the nearest neighbor). When  $d > 3.5$  m, the attraction is so weak that there is no gain in truncating  $F_{\text{Att}}$  beyond this value. Cohesion values are scaled with  $\lambda_M = 0.87$ .

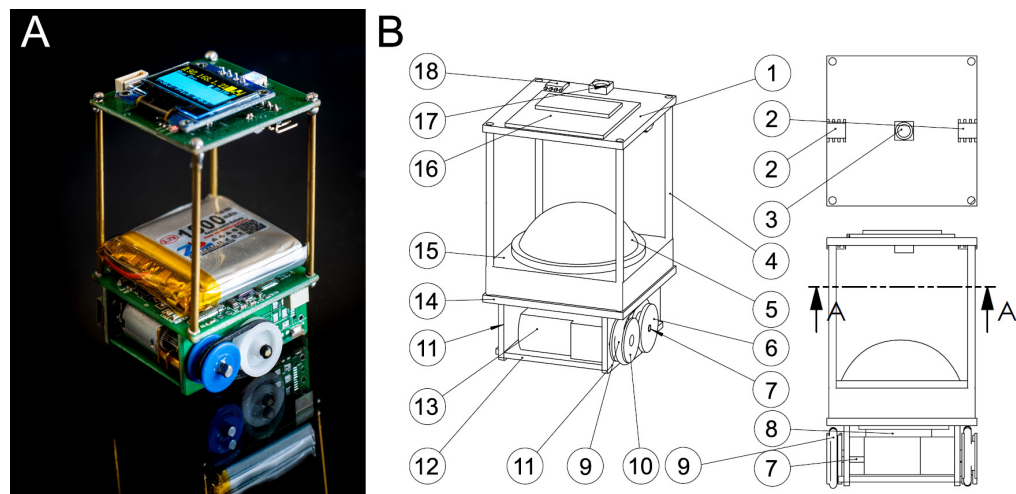

**Fig 11. Cuboid robots.** (A) Photograph of a Cuboid robot. Credits to David Villa ScienceImage/CBI/CNRS, Toulouse, 2018. (B) Design structure of Cuboid robot; A-A represents a cutaway view.

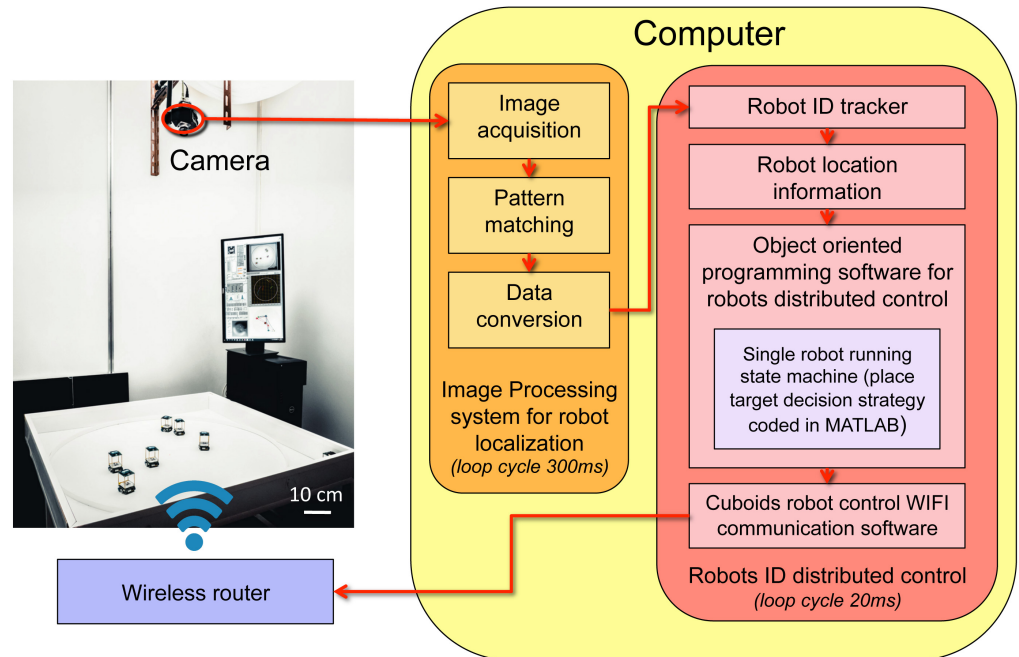

**Fig 12. Structure of Cuboids swarm platform.** Two main parts: the physical hardware and the control software. The hardware consists of a square platform. A camera mounted on the top of it to monitor the movements of Cuboids robots, which are controlled in a distributed way by a wireless router. The software processes the image acquired by the camera, then computed the actions to be performed by each robot, and finally sends the control signals to the robots via the wireless router. Credits to David Villa ScienceImage/CBI/CNRS, Toulouse, 2018.

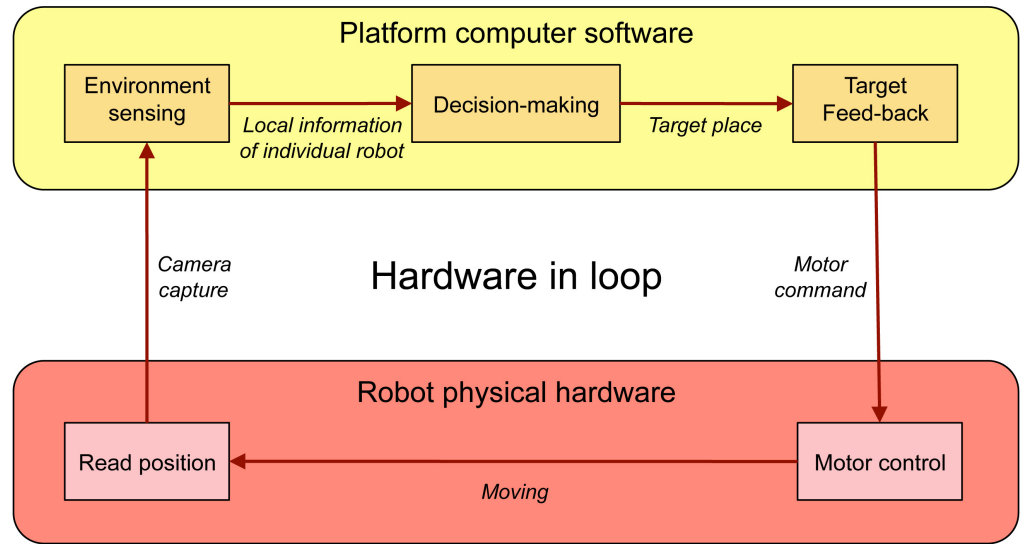

**Fig 13. Hardware in Loop (HIL) simulation (from [35]).** The structure of HIL consists of two parts: 1) Control Software and 2) Physical hardware. First the Control Software acquires the position of each robot. Then the Control Software generates a motor command for each robot based its local information. The robots receive theses motor commands and perform the corresponding movements that are monitored by the camera.

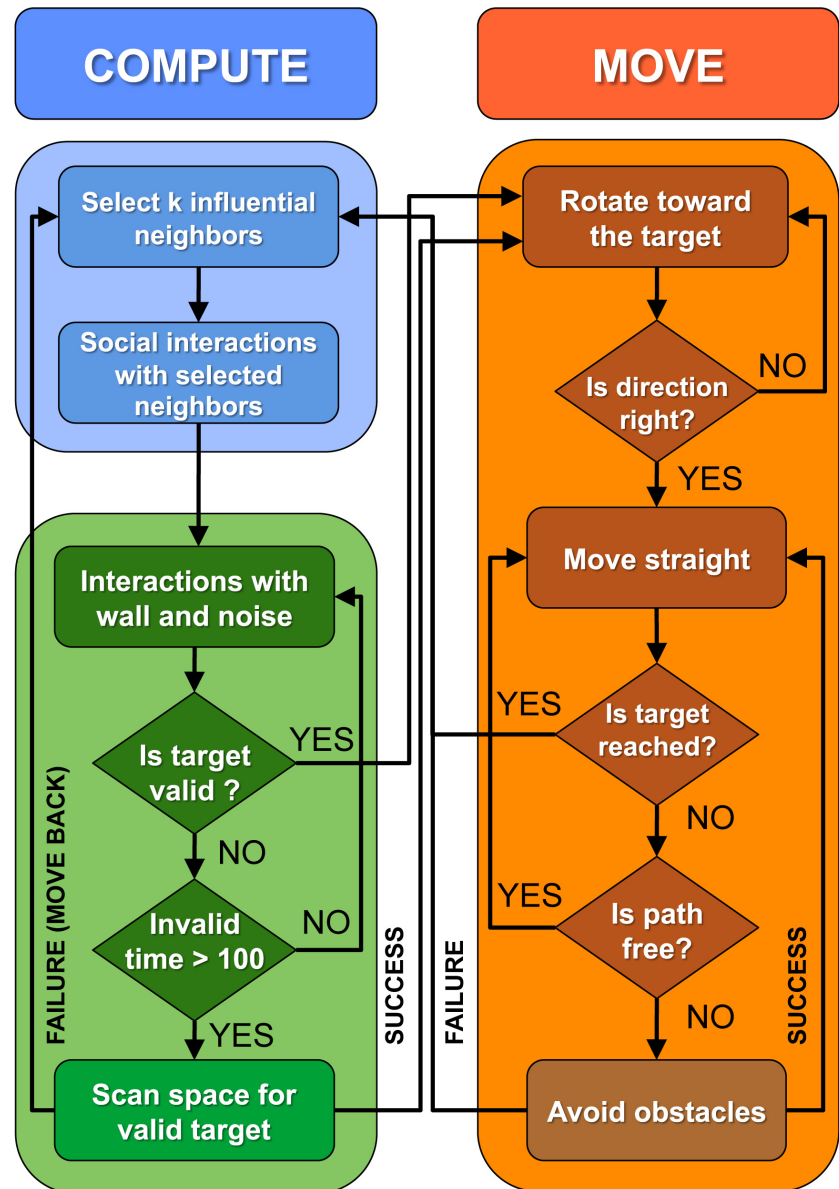

**Fig 14. Flow chart of robot states machine.** At any time a robot can be in one of the two following states: (1) the COMPUTE state for choosing a new target place, and (2) the MOVE state to reach the target place. In the COMPUTE state, the robot first selects influential neighbors, then it computes the pairwise influence of each neighbor, and finally it adds all influences to generate a new target place. Before moving, the choice of a valid target place is then validated to avoid collisions with the wall or another robot. If a valid target place cannot be found the robot scans all space for finding a valid target place. If the scanning method cannot find a valid target, the robot moves back over a distance of 80mm and starts again the COMPUTE state. When a valid target place has been found, the robot switches into the MOVE state. The robot first rotates towards to the target and then, moves straight to it. If another running neighbor blocks the path, the robot uses a procedure to avoid the obstacles.

## 1017 Supporting Information

1018 **S1 Video. Collective movements in rummy-nose tetra (*Hemigrammus rhodos-***  
1019 ***tomus*).** A typical experiment with a group of 5 fish swimming in a circular tank of  
1020 radius 250 mm.

1021 **S2 Video. Collective motion in a group of 5 robots.** Each robot interacts with  
1022 its most influential neighbor. The video is accelerated 9 times. Total duration: 7.15  
1023 minutes.

1024 **S3 Video. Tracking and analysis output.** The small circles superimposed on  
1025 the trajectories represents the kicks performed by the fish when the speed reaches its  
1026 maximum value.

1027 **S4 Video. Counter milling behavior in a group of 5 fish.** Top: Typical ex-  
1028 periment with a group of 5 fish in a circular arena of radius 250 mm. The video is  
1029 accelerated 6 times. Total duration 1.3 minutes. Bottom: Relative movement of fish  
1030 with respect to the barycenter of the group, represented by the black arrow on top video  
1031 and a black disk on the bottom video. Fish turn counter-clockwise around the tank and  
1032 clockwise with respect to the barycenter.

1033 **S5 Video. Swarm robotics experiment where there is no social interaction**  
1034 **between the robots ( $k = 0$ ) and only obstacle avoidance behavior is at play.**  
1035 Top: Typical experiment with a group of 5 robots in a circular arena of radius 420 mm,  
1036 captured by the top camera. The border of the arena is represented by the red circle.  
1037 Purple circles represent the individual robot safety area, of diameter 8 cm. Small green  
1038 dots in front of robots indicate their next target place. The video is accelerated 6 times.  
1039 Total duration: 6 minutes. Bottom: Relative movement of the robots with respect to the  
1040 barycenter of the group. The barycenter is represented by the black disk and remains  
1041 oriented to the right. Robots are represented by colored disks with their identification  
1042 number in the center. The small circle at the front of a robot indicates its heading. The  
1043 arrows represent the interactions between robots. Arrow direction indicates the identity  
1044 (color) of the robot that exerts its influence on the robot to which the arrow points. The  
1045 small dots in front of the robots represent the next target places.

1046 **S6 Video. Swarm robotics experiment where robots interact with the  $k = 1$**   
1047 **nearest neighbor.** Top: Typical experiment with a group of 5 robots in a circular  
1048 arena of radius 420 mm, captured by the top camera. The border of the arena is  
1049 represented by the red circle. Purple circles represent the individual robot safety area, of  
1050 diameter 8 cm. Small green dots in front of robots indicate their next target place. The  
1051 video is accelerated 6 times. Total duration: 6 minutes. Bottom: Relative movement of  
1052 the robots with respect to the barycenter of the group. The barycenter is represented  
1053 by the black disk and remains oriented to the right. Robots are represented by colored  
1054 disks with their identification number in the center. The small circle at the front of  
1055 a robot indicates its heading. The arrows represent the interactions between robots.  
1056 Arrow direction indicates the identity (color) of the robot that exerts its influence on  
1057 the robot to which the arrow points. The small dots in front of the robots represent the  
1058 next target places.

1059 **S7 Video. Swarm robotics experiment where robots interact with the  $k = 1$**   
1060 **most influential neighbor.** Top: Typical experiment with a group of 5 robots in a  
1061 circular arena of radius 420 mm, captured by the top camera. The border of the arena is

1062 represented by the red circle. Purple circles represent the individual robot safety area, of  
1063 diameter 8 cm. Small green dots in front of robots indicate their next target place. The  
1064 video is accelerated 6 times. Total duration: 6 minutes. Bottom: Relative movement of  
1065 the robots with respect to the barycenter of the group. The barycenter is represented  
1066 by the black disk and remains oriented to the right. Robots are represented by colored  
1067 disks with their identification number in the center. The small circle at the front of  
1068 a robot indicates its heading. The arrows represent the interactions between robots.  
1069 Arrow direction indicates the identity (color) of the robot that exerts its influence on  
1070 the robot to which the arrow points. The small dots in front of the robots represent the  
1071 next target places.

1072 **S8 Video. Swarm robotics experiment where robots interact with  $k = 1$**   
1073 **neighbor selected randomly.** Top: Typical experiment with a group of 5 robots in a  
1074 circular arena of radius 420 mm, captured by the top camera. The border of the arena is  
1075 represented by the red circle. Purple circles represent the individual robot safety area, of  
1076 diameter 8 cm. Small green dots in front of robots indicate their next target place. The  
1077 video is accelerated 6 times. Total duration: 6 minutes. Bottom: Relative movement of  
1078 the robots with respect to the barycenter of the group. The barycenter is represented  
1079 by the black disk and remains oriented to the right. Robots are represented by colored  
1080 disks with their identification number in the center. The small circle at the front of  
1081 a robot indicates its heading. The arrows represent the interactions between robots.  
1082 Arrow direction indicates the identity (color) of the robot that exerts its influence on  
1083 the robot to which the arrow points. The small dots in front of the robots represent the  
1084 next target places.

1085 **S9 Video. Swarm robotics experiment where robots interact with the  $k = 2$**   
1086 **nearest neighbors.** Top: Typical experiment with a group of 5 robots in a circular  
1087 arena of radius 420 mm, captured by the top camera. The border of the arena is  
1088 represented by the red circle. Purple circles represent the individual robot safety area, of  
1089 diameter 8 cm. Small green dots in front of robots indicate their next target place. The  
1090 video is accelerated 6 times. Total duration: 6 minutes. Bottom: Relative movement of  
1091 the robots with respect to the barycenter of the group. The barycenter is represented  
1092 by the black disk and remains oriented to the right. Robots are represented by colored  
1093 disks with their identification number in the center. The small circle at the front of  
1094 a robot indicates its heading. The arrows represent the interactions between robots.  
1095 Arrow direction indicates the identity (color) of the robot that exerts its influence on  
1096 the robot to which the arrow points. The small dots in front of the robots represent the  
1097 next target places.

1098 **S10 Video. Swarm robotics experiment where robots interact with the  $k = 2$**   
1099 **most influential neighbor.** Top: Typical experiment with a group of 5 robots in a  
1100 circular arena of radius 420 mm, captured by the top camera. The border of the arena is  
1101 represented by the red circle. Purple circles represent the individual robot safety area, of  
1102 diameter 8 cm. Small green dots in front of robots indicate their next target place. The  
1103 video is accelerated 6 times. Total duration: 6 minutes. Bottom: Relative movement of  
1104 the robots with respect to the barycenter of the group. The barycenter is represented  
1105 by the black disk and remains oriented to the right. Robots are represented by colored  
1106 disks with their identification number in the center. The small circle at the front of  
1107 a robot indicates its heading. The arrows represent the interactions between robots.  
1108 Arrow direction indicates the identity (color) of the robot that exerts its influence on  
1109 the robot to which the arrow points. The small dots in front of the robots represent the  
1110 next target places.

1111 **S11 Video. Swarm robotics experiment where robots interact with  $k = 2$**   
1112 **neighbors selected randomly.** Top: Typical experiment with a group of 5 robots in a  
1113 circular arena of radius 420 mm, captured by the top camera. The border of the arena is  
1114 represented by the red circle. Purple circles represent the individual robot safety area, of  
1115 diameter 8 cm. Small green dots in front of robots indicate their next target place. The  
1116 video is accelerated 6 times. Total duration: 6 minutes. Bottom: Relative movement of  
1117 the robots with respect to the barycenter of the group. The barycenter is represented  
1118 by the black disk and remains oriented to the right. Robots are represented by colored  
1119 disks with their identification number in the center. The small circle at the front of  
1120 a robot indicates its heading. The arrows represent the interactions between robots.  
1121 Arrow direction indicates the identity (color) of the robot that exerts its influence on  
1122 the robot to which the arrow points. The small dots in front of the robots represent the  
1123 next target places.

1124 **S12 Video. Swarm robotics experiment where robots interact with the  $k = 3$**   
1125 **nearest neighbors.** Top: Typical experiment with a group of 5 robots in a circular  
1126 arena of radius 420 mm, captured by the top camera. The border of the arena is  
1127 represented by the red circle. Purple circles represent the individual robot safety area, of  
1128 diameter 8 cm. Small green dots in front of robots indicate their next target place. The  
1129 video is accelerated 6 times. Total duration: 6 minutes. Bottom: Relative movement of  
1130 the robots with respect to the barycenter of the group. The barycenter is represented  
1131 by the black disk and remains oriented to the right. Robots are represented by colored  
1132 disks with their identification number in the center. The small circle at the front of  
1133 a robot indicates its heading. The arrows represent the interactions between robots.  
1134 Arrow direction indicates the identity (color) of the robot that exerts its influence on  
1135 the robot to which the arrow points. The small dots in front of the robots represent the  
1136 next target places.

1137 **S13 Video. Swarm robotics experiment where robots interact with  $k = 3$**   
1138 **neighbors selected randomly.** Top: Typical experiment with a group of 5 robots in a  
1139 circular arena of radius 420 mm, captured by the top camera. The border of the arena is  
1140 represented by the red circle. Purple circles represent the individual robot safety area, of  
1141 diameter 8 cm. Small green dots in front of robots indicate their next target place. The  
1142 video is accelerated 6 times. Total duration: 6 minutes. Bottom: Relative movement of  
1143 the robots with respect to the barycenter of the group. The barycenter is represented  
1144 by the black disk and remains oriented to the right. Robots are represented by colored  
1145 disks with their identification number in the center. The small circle at the front of  
1146 a robot indicates its heading. The arrows represent the interactions between robots.  
1147 Arrow direction indicates the identity (color) of the robot that exerts its influence on  
1148 the robot to which the arrow points. The small dots in front of the robots represent the  
1149 next target places.

1150 **S14 Video. Swarm robotics experiment where robots interact with every**  
1151 **other robot ( $k = 4$ ).** Top: Typical experiment with a group of 5 robots in a circular  
1152 arena of radius 420 mm, captured by the top camera. The border of the arena is  
1153 represented by the red circle. Purple circles represent the individual robot safety area, of  
1154 diameter 8 cm. Small green dots in front of robots indicate their next target place. The  
1155 video is accelerated 6 times. Total duration: 6 minutes. Bottom: Relative movement of  
1156 the robots with respect to the barycenter of the group. The barycenter is represented  
1157 by the black disk and remains oriented to the right. Robots are represented by colored  
1158 disks with their identification number in the center. The small circle at the front of  
1159 a robot indicates its heading. The arrows represent the interactions between robots.



1160 Arrow direction indicates the identity (color) of the robot that exerts its influence on  
1161 the robot to which the arrow points. The small dots in front of the robots represent the  
1162 next target places.

1163 **S1 Fig. Density map of cohesion and polarization for fish and model simu-**  
1164 **lations, normalized with the number of data per range of polarization.**

1165 Density map of cohesion for different ranges of the polarization, for fish and for the  
1166 11 strategies used in the model simulations. Units of cohesion is cm in fish and  $\lambda_M$  cm  
1167 in simulations ( $\lambda_M = 0.87$ ). Color intensity is number of data in boxes normalized with  
1168 the total number of data in the grid ( $\times 1000$ ). We used  $40 \times 50$  boxes.

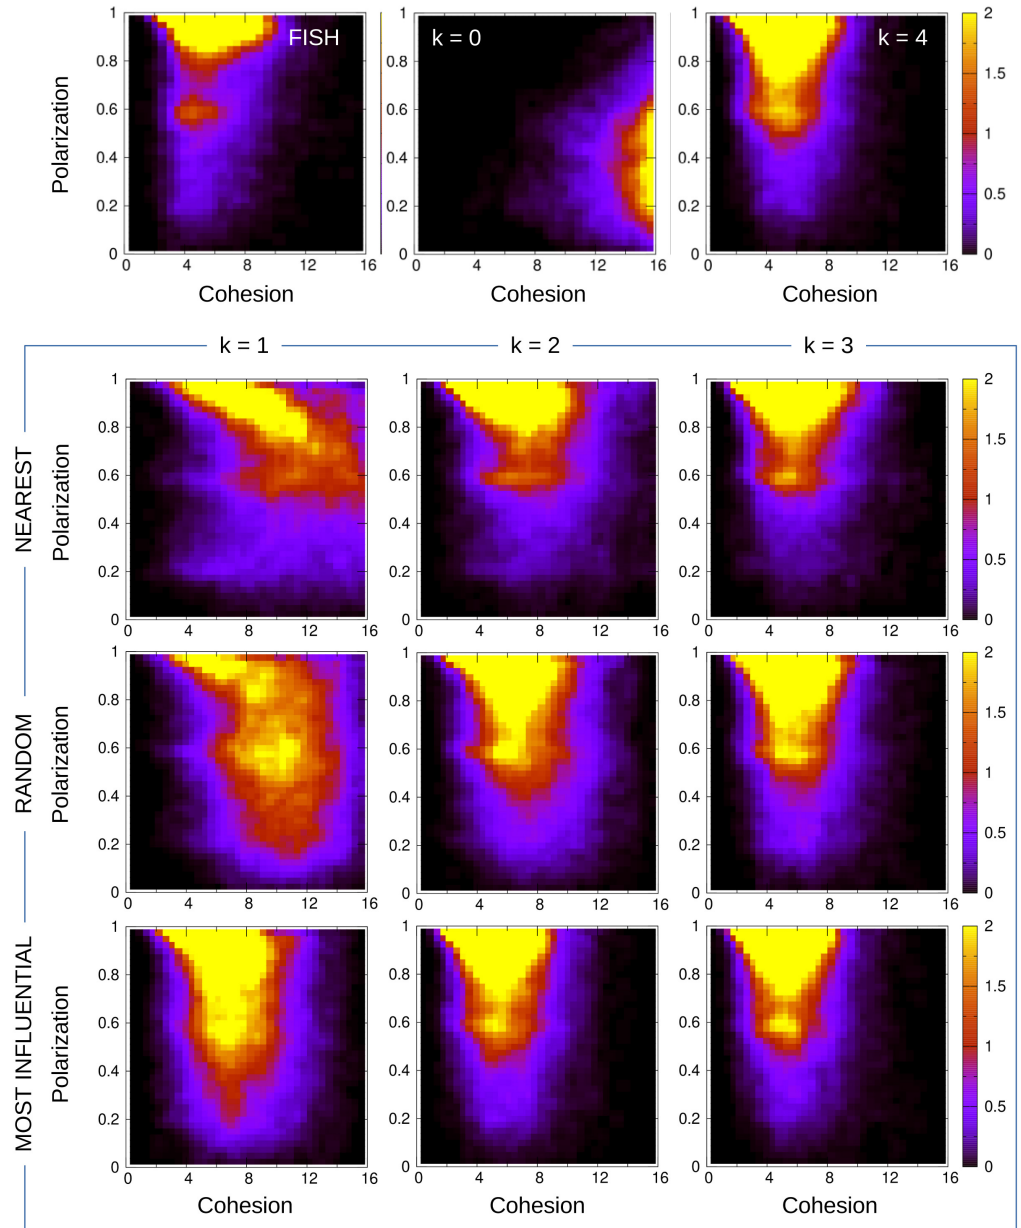

1169 **S2 Fig. Density map of cohesion and polarization for fish and robotic**  
1170 **swarm, normalized with the total number of data.**

1171 Density map of cohesion for different ranges of the polarization, for fish and for the  
1172 10 strategies implemented in the robotic swarm. Units of cohesion is cm in fish and  
1173  $\lambda_R$  cm in robots ( $\lambda_R = 0.35$ ). Color intensity is number of data in boxes normalized with  
1174 the total number of data in the grid ( $\times 1000$ ). We used  $40 \times 50$  boxes.

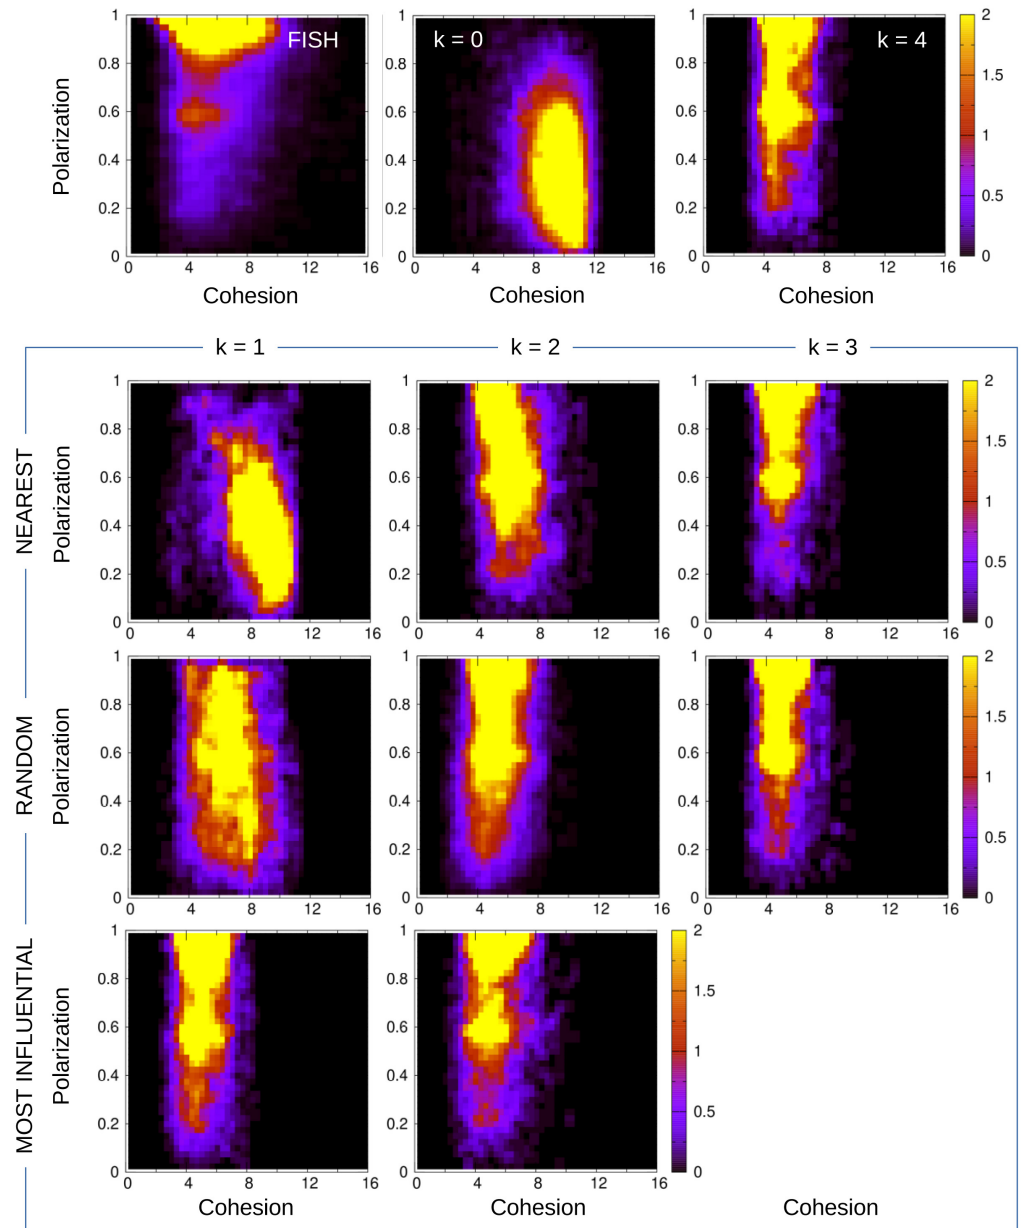

1175 **S3 Fig. Density map of cohesion and polarization for fish and model simu-**  
1176 **lations, normalized with the number of data per range of polarization.**  
1177 Density map of cohesion for different ranges of polarization, for fish and for the 11 strate-  
1178 gies used in the model simulations. Units of cohesion is cm in fish and  $\lambda_M$  cm in simu-  
1179 lations. Color intensity is number of data in boxes normalized with the number of data  
1180 per interval of polarization, *i.e.*, each row is the PDF of the cohesion for a range of  
1181 values of the polarization. We used  $40 \times 50$  boxes.

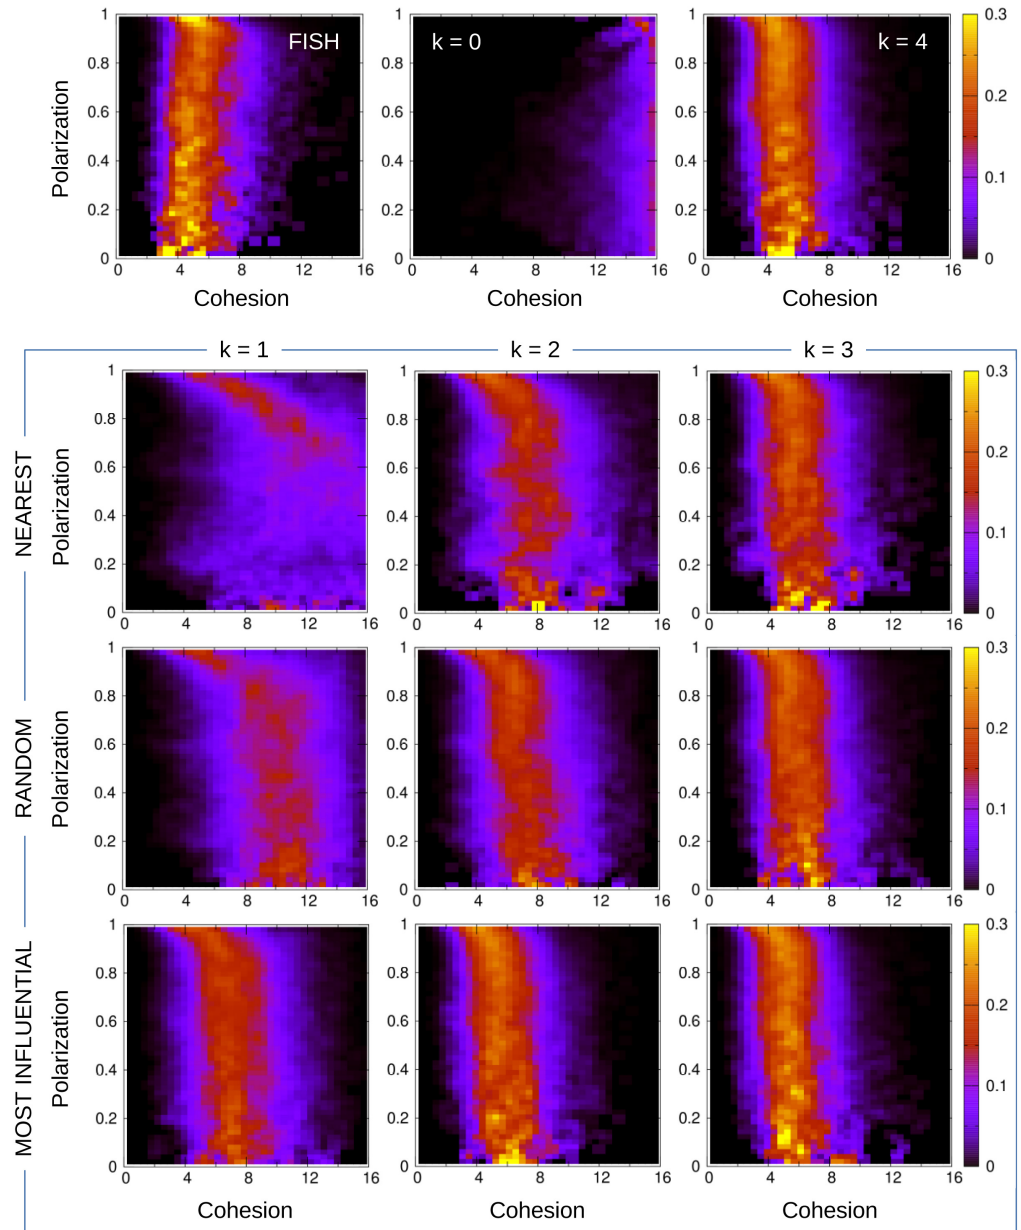

1182 **S4 Fig. Density map of cohesion and polarization for fish and robotic**  
1183 **swarm, normalized with the total number of data.**

1184 Density map of cohesion for different ranges of polarization, for fish and for the 10 strate-  
1185 gies used in the robotic swarm. Units of cohesion is cm in fish and  $\lambda_M$  cm in simulations.  
1186 Color intensity is number of data in boxes normalized with the number of data per in-  
1187 terval of polarization, *i.e.*, each row is the PDF of the cohesion for a range of values of  
1188 the polarization. We used  $40 \times 50$  boxes.

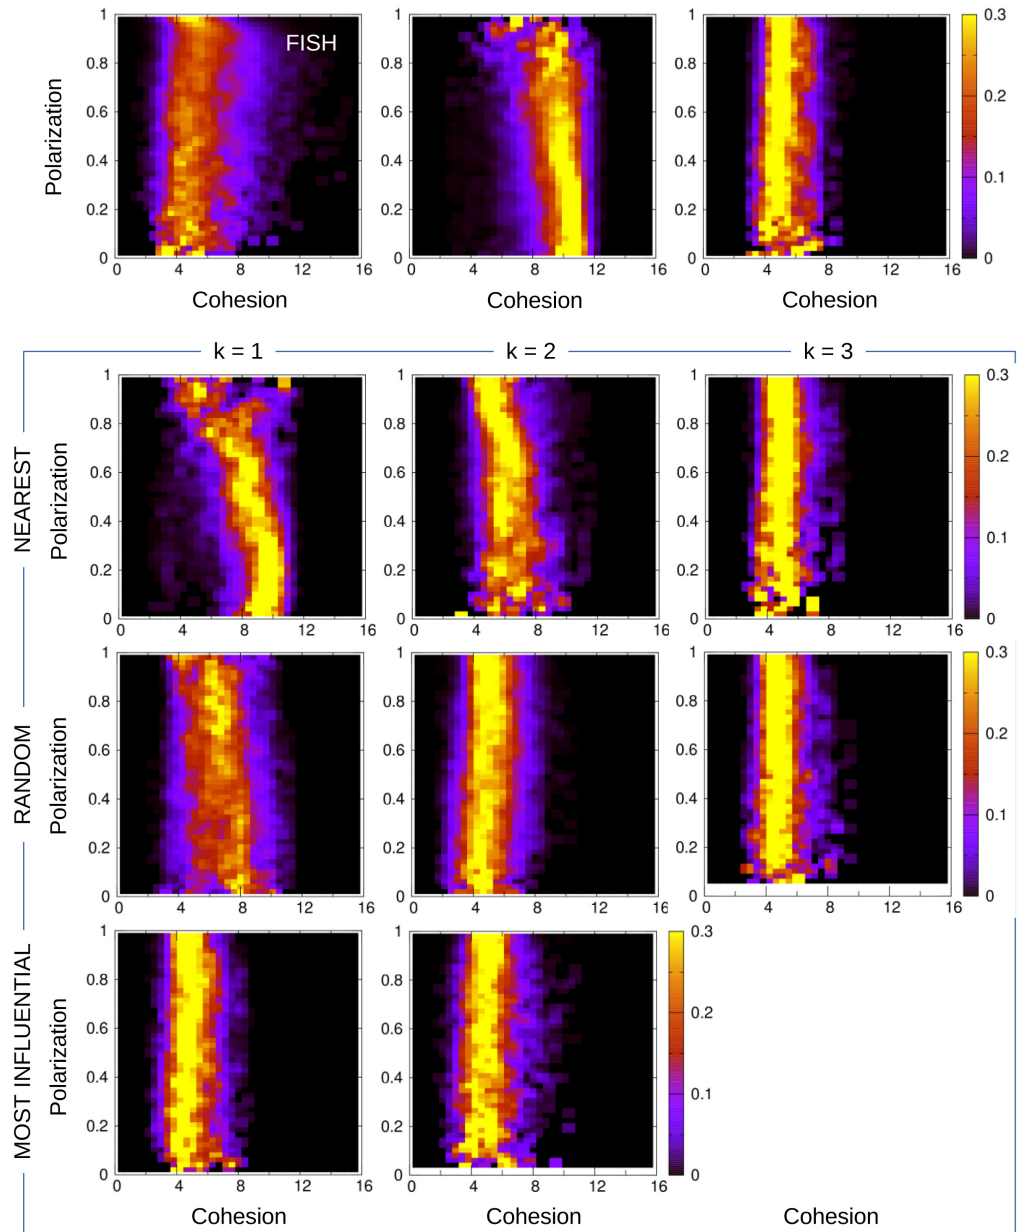

1189 **S5 Fig. Counter-milling in model simulations.** Red arrows denote velocity field  
1190 (mean speed and direction) of agents in the reference system of the barycenter of the  
1191 group, here located at coordinates (0,0). Orange circle denotes the average relative  
1192 position of the border of the arena with respect to the barycenter. The cases where  
1193 agents interact with the  $k = 3$  most influential neighbors (statistically identical to the  
1194 case where  $k = 4$ ) and where agents do not interact ( $k = 0$ ) are not depicted.

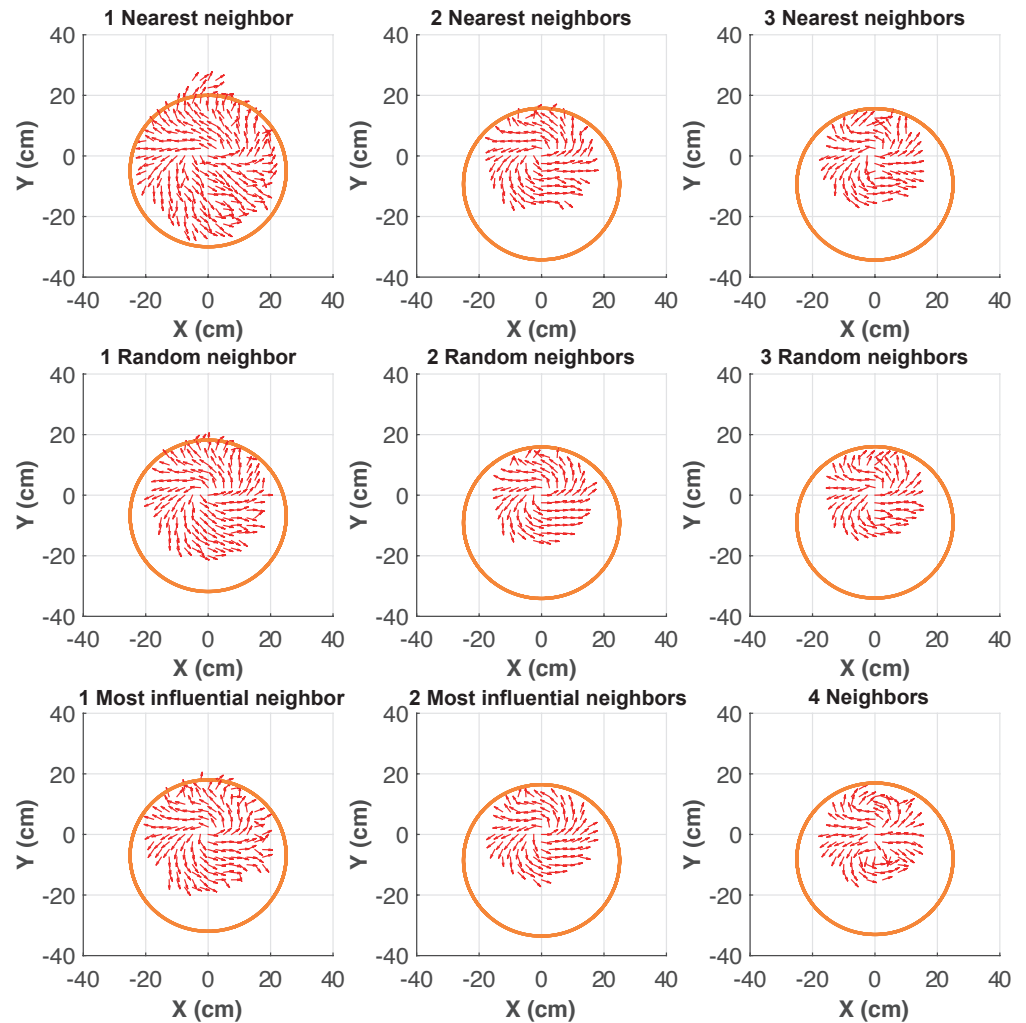

1195 **S6 Fig. Counter-milling in robotics swarm experiments.** Red arrows denote  
1196 velocity field (mean speed and direction) of robots in the reference system of the barycenter  
1197 of the group, here located at coordinates (0,0). Orange circle denotes the average  
1198 relative position of the border of the arena with respect to the barycenter. The cases  
1199 where robots interact with the  $k = 3$  most influential neighbors (statistically identical  
1200 to the case where  $k = 4$ ) and where robots do not interact ( $k = 0$ ) are not depicted.

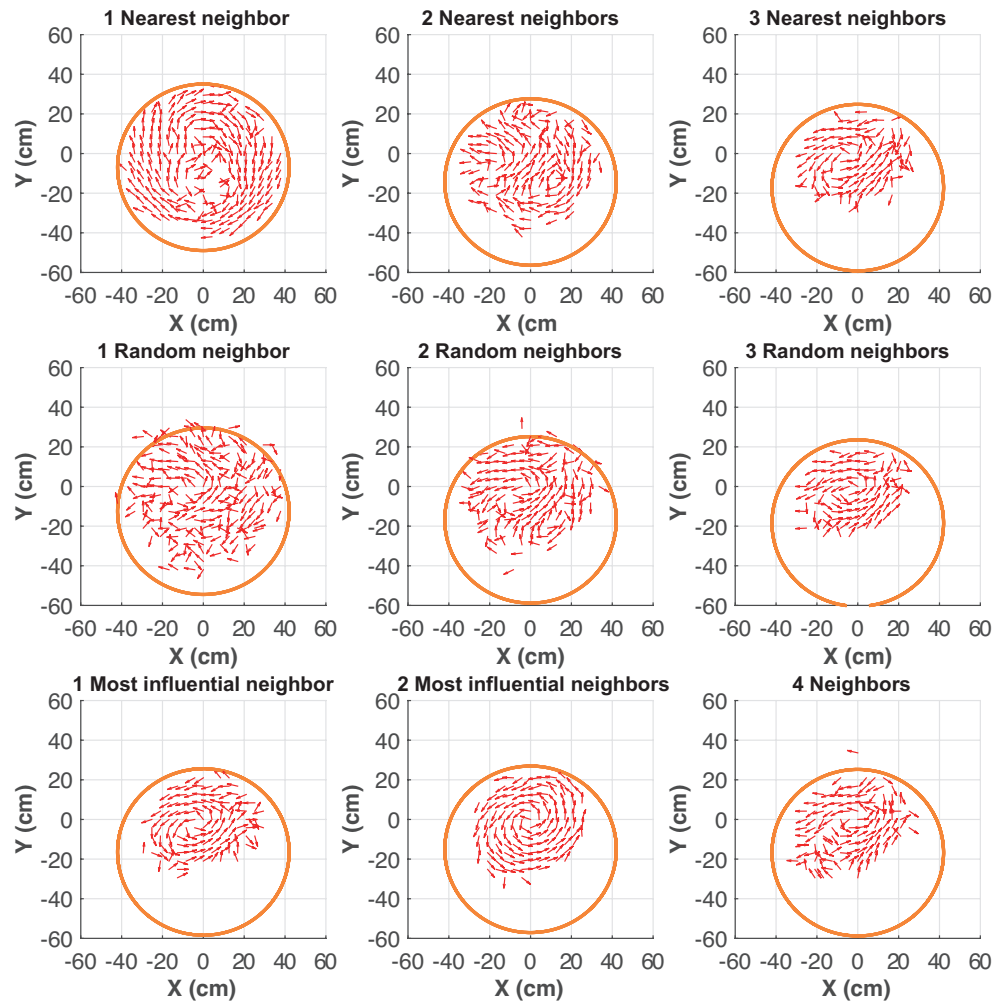

1201 **S7 Fig. Interaction functions with the wall and between individuals, ex-**  
 1202 **tracted from experiments of fish swimming in pairs [14].** (A) Intensity of the  
 1203 repulsion from the wall  $f_w(r_{w,i})$  (green) as a function of the distance to the wall  $r_{w,i}$ ,  
 1204 and intensity of the attraction  $f_{Att}(d_{ij})$  (red) and the alignment  $f_{Ali}(d_{ij})$  (blue) between  
 1205 fish  $i$  and  $j$  as functions of the distance  $d_{ij}$  separating them. (B) Normalized odd angular  
 1206 function  $O_w(\theta_{w,i})$  modulating the interaction with the wall as a function of the  
 1207 relative angle to the wall  $\theta_{w,i}$ . (C) Normalized angular functions  $O_{Att}(\psi_{ij})$  (odd, in red)  
 1208 and  $E_{Att}(\phi_{ij})$  (even, in orange) of the attraction interaction, and (D)  $O_{Ali}(\phi_{ij})$  (odd,  
 1209 in blue) and  $E_{Ali}(\psi_{ij})$  (even, in violet) of the alignment interaction between agents  $i$   
 1210 and  $j$ , as functions of the angle of perception  $\psi_{ij}$  and the relative heading  $\phi_{ij}$ .

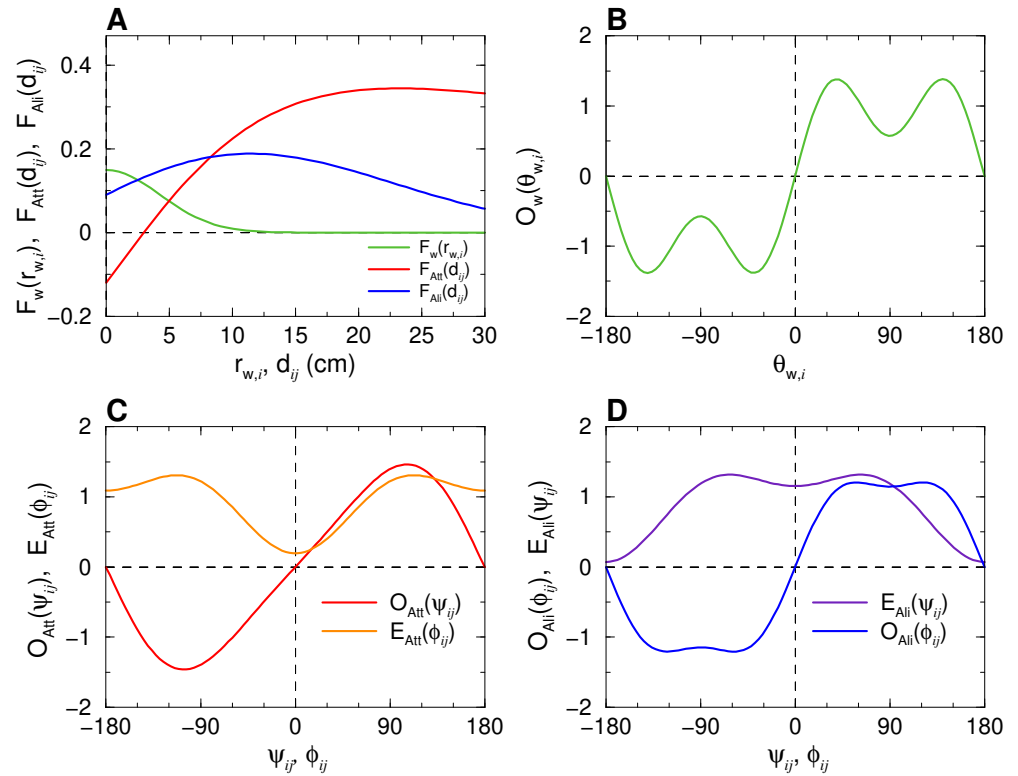



| Parameter                                           | Symbol         | Model | Robots |
|-----------------------------------------------------|----------------|-------|--------|
| Intensity of heading random fluctuations            | $\gamma_R$     | 0.45  | 0.1    |
| Fluctuations reduction factor when close to wall    | $\alpha$       | 0.67  | 1      |
| Intensity of wall repulsion                         | $\gamma_w$     | 0.15  | 0.79   |
| Range of wall repulsion (cm)                        | $l_w$          | 6     | 11     |
| Intensity of attraction/repulsion                   | $\gamma_{Att}$ | 0.12  | 0.18   |
| Range of attraction between individuals (cm)        | $l_{Att}$      | 20    | 37     |
| Distance of balance of attraction/repulsion (cm)    | $d_{Att}$      | 3     | 18     |
| Intensity of alignment                              | $\gamma_{Ali}$ | 0.09  | 0.04   |
| Range of alignment between individuals (cm)         | $l_{Ali}$      | 20    | 37     |
| Distance of alignment (cm)                          | $d_{Ali}$      | 6     | 5      |
| Average duration between successive kicks (s)       | $\tau$         | 0.5   | 1.3    |
| Mean length between two successive kicks (cm)       | $l$            | 7     | 7.4    |
| Typical individual velocity in active period (cm/s) | $v_0$          | 14    | 3.75   |
| Relaxation time (s)                                 | $\tau_0$       | 0.8   | 0.9    |

**Table 1.** Values and units of the parameters for model simulations and robots.
